# Supplementary material for: GeneMark-ETP significantly improves the accuracy of automatic annotation of large eukaryotic genomes
Source: HighWire-hosted journal article supplement (doi:10.1101/gr.278373.123), 2024-05-01
Supplement: Supplemental_Table_S1.xlsx [file Supplemental_Table_S1.xlsx]

## Sheet: Supplemental Table S1
Supplemental Table S1. The numbers of the HC genes predicted by GeneMarkS-TP in the seven genomes, along with Sn/Pr measures computed with respect to the sets of annotated genes as described in the Data Sets section ‘Computation of accuracy measures’. The results are listed for the ‘Order excluded’ and the ‘Species excluded’ databases (top and bottom sections, respectively).
	Species	Order excluded DB		Ratio of # of HC genes to # of annotated genes	Sn/Pr for predicted HC genes
		# of proteins in DB	# of HC genes found
	C. elegans	8168321	8062	0.403726	35.7 / 88.4
	A. thaliana	3160482	16008	0.583276	55.0 / 94.7
	D. melanogaster	1785203	8109	0.581249	59.6 / 81.8
	S. lycopersicum	3116328	17231	0.684911	74.9 / 95.2
	D. rerio	4791893	16918	0.660576	67.0 / 88.5
	G. gallus	4933362	12473	0.721859	74.4 / 89.1
	M. musculus	1835426	13057	0.577462	63.5 / 93.2
	Species	Species excluded DB		Ratio of # of HC genes to # of annotated genes	Sn/Pr for predicted HC genes
		# of proteins in DB	# of HC genes found
	C. elegans	8245445	11399	0.570835	51.7 / 90.6
	A. thaliana	3483291	16551	0.603061	58.8 / 97.6
	D. melanogaster	2588444	9223	0.6611	63.7 / 96.3
	S. lycopersicum	3456742	17489	0.695167	75.8 / 95.1
	D. rerio	4973735	16573	0.647105	66.9 / 90.4
	G. gallus	4984020	12564	0.727125	74.0 / 88.4
	M. musculus	2228727	12965	0.573393	63.9 / 94.5
