# Supplementary material for: GeneMark-ETP significantly improves the accuracy of automatic annotation of large eukaryotic genomes
Source: HighWire-hosted journal article supplement (doi:10.1101/gr.278373.123), 2024-05-01
Supplement: Supplemental_Table_S2.xlsx [file Supplemental_Table_S2.xlsx]

## Sheet: Supplemental_Table_S2
Supplemental Table S2. Gene and exon level prediction accuracy of the HC CDSs candidates and GeneMark-ETP final gene predictions for the four large genomes (longer than 300 Mbp). The larger F1 values are shown in bold. The gene candidates with no extrinsic match do not make it into the list of genes predicted by GeneMark-ETP.
	Species		Order excluded DB		Species excluded DB
			Candidates	Output	Candidates	Output
	S. lycopersicum	gene Sn	89.5	88.2	90.6	90.2
		gene Pr	70.6	81.4	70.9	79.8
		gene F1	78.9	84.7	79.5	84.6
		exon Sn	97.1	96.7	97.4	97.2
		exon Pr	87.1	92.6	87	91.6
		exon F1	91.8	94.6	91.9	94.3
	D. rerio	gene Sn	72.9	72.7	73.8	73.8
		gene Pr	39.4	56.5	40.3	56.8
		gene F1	51.2	63.6	52.2	64.2
		exon Sn	93.9	93.6	94.2	94
		exon Pr	73.7	85.1	74.1	85.1
		exon F1	82.5	89.2	82.9	89.3
	G. gallus	gene Sn	78.1	78	77.5	77.5
		gene Pr	40.7	67.2	40	65.9
		gene F1	53.5	72.2	52.8	71.2
		exon Sn	95.5	95.4	95.4	95.4
		exon Pr	76.9	90.7	76.5	90.3
		exon F1	85.2	93	85	92.8
	M. musculus	gene Sn	71.7	71.3	72.8	72.7
		gene Pr	34.5	66	35.3	65.9
		gene F1	46.5	68.6	47.6	69.1
		exon Sn	91.6	91.2	92	91.7
		exon Pr	70.1	90.7	70.7	90.7
		exon F1	79.4	91	79.9	91.2
