# Supplementary material for: GeneMark-ETP significantly improves the accuracy of automatic annotation of large eukaryotic genomes
Source: HighWire-hosted journal article supplement (doi:10.1101/gr.278373.123), 2024-05-01
Supplement: Supplemental_Table_S3.xlsx [file Supplemental_Table_S3.xlsx]

## Sheet: Supplemental_Table_S3
Supplemental Table S3. Gene- and exon-level accuracy of the CDSs predictions made by the ab initio GeneMark-ES (ES), the RNA-seq supported GeneMark-ET(ET), the protein similarity supported GeneMark-EP+ (EP+), and GeneMark-ETP (ETP), supported by both extrinsic sources. Genomes longer than 300Mb require extrinsic information to guide the convergence of GeneMark-ES. Therefore, the GeneMark-ES predi…
	Species		ES	ET	Order excluded DB		Species excluded DB
					EP+	ETP	EP+	ETP
	C. elegans	Gene Sn	48.21	48.88	48.54	60.35	55.23	68.4
		Gene Pr	47.86	48.77	46.75	67.72	53.77	73.75
		Gene F1	48.03	48.82	47.63	63.82	54.49	70.97
		Exon Sn	81.84	81.74	81.09	82.93	83.32	85.91
		Exon Pr	83.12	83.71	81.95	90.14	84.93	91.37
		Exon F1	82.48	82.71	81.52	86.38	84.12	88.56
	A. thaliana	Gene Sn	55.8	57.07	66.59	75.83	73.36	77.87
		Gene Pr	55.92	57.32	65.91	79.96	71.46	81.02
		Gene F1	55.86	57.19	66.25	77.84	72.4	79.41
		Exon Sn	76.89	77.13	79.84	82.27	81.45	82.92
		Exon Pr	80.79	82.09	84.92	90.91	86.32	91.03
		Exon F1	78.79	79.53	82.3	86.37	83.81	86.79
	D. melanogaster	Gene Sn	51.16	53.26	56.48	71.46	69.91	78.85
		Gene Pr	48.49	49.72	53.87	77.91	63.48	83.07
		Gene F1	49.79	51.43	55.14	74.55	66.54	80.91
		Exon Sn	67.84	68.59	70.18	76.36	76.49	80.74
		Exon Pr	72.81	74.2	77.29	89.68	81.14	91.41
		Exon F1	70.24	71.28	73.56	82.49	78.75	85.74
	S. lycopersicum	Gene Sn		47.22	67.02	88.23	72.7	90.16
		Gene Pr		37.38	51.34	81.37	54.77	79.76
		Gene F1		41.73	58.14	84.66	62.47	84.64
		Exon Sn		83.49	90.49	96.68	92.13	97.23
		Exon Pr		74.19	79.97	92.64	80.65	91.58
		Exon F1		78.57	84.91	94.62	86.01	94.32
	D. rerio	Gene Sn		20.42	35.72	72.7	39.57	73.8
		Gene Pr		7.5	13.3	56.47	14.7	56.84
		Gene F1		10.97	19.38	63.57	21.44	64.22
		Exon Sn		79.09	84.87	93.64	86.15	94.01
		Exon Pr		50.27	55.86	85.13	56.45	85.11
		Exon F1		61.47	67.37	89.18	68.21	89.34
	G. gallus	Gene Sn		2.35	14.11	78.02	14.4	77.48
		Gene Pr		1.41	11.31	67.19	11.62	65.85
		Gene F1		1.76	12.56	72.2	12.86	71.19
		Exon Sn		15.05	28.68	95.43	29.02	95.39
		Exon Pr		27	53.37	90.73	53.79	90.28
		Exon F1		19.33	37.31	93.02	37.7	92.76
	M. musculus	Gene Sn		7.81	21.98	71.26	23.7	72.7
		Gene Pr		5.4	14.95	66.03	15.95	65.85
		Gene F1		6.39	17.8	68.55	19.07	69.11
		Exon Sn		49.74	57.3	91.2	58.07	91.74
		Exon Pr		50.85	64.23	90.73	64.81	90.65
		Exon F1		50.29	60.57	90.96	61.26	91.19
