# Supplementary material for: GeneMark-ETP significantly improves the accuracy of automatic annotation of large eukaryotic genomes
Source: HighWire-hosted journal article supplement (doi:10.1101/gr.278373.123), 2024-05-01
Supplement: Supplemental_Table_S4.xlsx [file Supplemental_Table_S4.xlsx]

## Sheet: Supplemental_Table_S4
Supplemental Table S4. Comparison of gene- and exon-level accuracy of CDS predictions made by RNA-seq-based BRAKER1, protein-based BRAKER2, TSEBRA, and GeneMark-ETP (ETP). Note that the low accuracy in genomes of G. gallus and M. musculus observed for BRAKER1, BRAKER2, and TSEBRA could be related to the use of a single statistical model for the genome-wide CDS prediction. GeneMark-ETP uses severa…
	Species		BRAKER1	Order excluded DB			Species excluded DB
				BRAKER2	TSEBRA	ETP	BRAKER2	TSEBRA	ETP
	C. elegans	Gene Sn	61.78	46.84	60.29	60.35	69.01	71.12	68.4
		Gene Pr	65.62	54.11	77.45	67.72	70.1	80.5	73.75
		Gene F1	63.64	50.21	67.8	63.82	69.55	75.52	70.97
		Exon Sn	84.96	74.02	76.62	82.93	84.79	83.88	85.91
		Exon Pr	88.51	87.77	93.38	90.14	91.52	93.78	91.37
		Exon F1	86.7	80.31	84.17	86.38	88.03	88.55	88.56
	A. thaliana	Gene Sn	59.55	72.55	73.6	75.83	79.24	79.25	77.87
		Gene Pr	61.29	70.05	81.18	79.96	75.56	82.75	81.02
		Gene F1	60.41	71.28	77.2	77.84	77.36	80.96	79.41
		Exon Sn	78.28	80.99	79.61	82.27	83.06	82.71	82.92
		Exon Pr	82.54	88.41	93.68	90.91	88.22	93.15	91.03
		Exon F1	80.35	84.54	86.07	86.37	85.56	87.62	86.79
	D. melanogaster	Gene Sn	63.75	61.06	67.98	71.46	78.88	79.97	78.85
		Gene Pr	62.34	60.88	75.38	77.91	73.56	80.85	83.07
		Gene F1	63.04	60.97	71.49	74.55	76.13	80.41	80.91
		Exon Sn	76.99	71.35	72.11	76.36	80.11	79.84	80.74
		Exon Pr	80.89	83.41	89.85	89.68	88.5	92.2	91.41
		Exon F1	78.89	76.91	80.01	82.49	84.1	85.58	85.74
	S. lycopersicum	Gene Sn	61.75	79.64	82.51	88.23	84.17	85.4	90.16
		Gene Pr	47.12	56.5	71.26	81.37	58.88	72.08	79.76
		Gene F1	53.45	66.1	76.47	84.66	69.29	78.18	84.64
		Exon Sn	90.66	94.2	94.89	96.68	95.37	96.09	97.23
		Exon Pr	75.53	82.75	90.29	92.64	82.34	90.18	91.58
		Exon F1	82.41	88.1	92.53	94.62	88.38	93.04	94.32
	D. rerio	Gene Sn	51.7	54.95	66.92	72.7	57.77	68.96	73.8
		Gene Pr	28.06	29.47	45.69	56.47	27.91	45.96	56.84
		Gene F1	36.38	38.36	54.3	63.57	37.64	55.16	64.22
		Exon Sn	91.12	87.98	89.43	93.64	89.36	90.05	94.01
		Exon Pr	75.42	78.9	87.18	85.13	76.15	86.75	85.11
		Exon F1	82.53	83.19	88.29	89.18	82.23	88.37	89.34
	G. gallus	Gene Sn	6.64	25.16	26.68	78.02	27.16	28.33	77.48
		Gene Pr	3.47	16.63	22.21	67.19	18.11	23.26	65.85
		Gene F1	4.56	20.02	24.24	72.2	21.73	25.55	71.19
		Exon Sn	66.14	34.95	59.76	95.43	35.29	60.01	95.39
		Exon Pr	48.12	59.23	74.44	90.73	60.55	74.35	90.28
		Exon F1	55.71	43.96	66.3	93.02	44.59	66.41	92.76
	M. musculus	Gene Sn	27.76	32.5	44.23	71.26	35.93	46.74	72.7
		Gene Pr	14.8	21.18	31.31	66.03	23.16	32.68	65.85
		Gene F1	19.31	25.65	36.67	68.55	28.17	38.47	69.11
		Exon Sn	83.89	57.56	77.37	91.2	59.3	78.12	91.74
		Exon Pr	67.53	71.6	83.25	90.73	72.72	83.46	90.65
		Exon F1	74.83	63.82	80.2	90.96	65.33	80.7	91.19
