# Supplementary material for: GeneMark-ETP significantly improves the accuracy of automatic annotation of large eukaryotic genomes
Source: HighWire-hosted journal article supplement (doi:10.1101/gr.278373.123), 2024-05-01
Supplement: Supplemental_Table_S5.xlsx [file Supplemental_Table_S5.xlsx]

## Sheet: Supplemental_Table_S5
Supplemental Table S5. The CDS prediction accuracy of MAKER2 and GeneMark-ETP was assessed for the three model species. The results given for MAKER2 are supposed to be upper bounds reached among possible methods of MAKER2 training. The protein databases are described in Section S3 of Supplemental Materials.
			D. melanogaster		D. rerio		M. musculus
			MAKER2	ETP	MAKER2	ETP	MAKER2	ETP
	exon	Sn	75.15	80.7	83.29	93.94	79.15	91.71
		Pr	73.96	91.43	79.22	84.87	77.42	87.91
		F1	74.5503	85.7306	81.204	89.175	78.2754	89.7698
	gene	Sn	60.23	79	47.66	73.53	41.59	73.05
		Pr	55.33	83.01	37.55	56.17	34.8	59.67
		F1	57.6761	80.9554	42.0052	63.6882	37.8932	65.6856
