# Supplementary material for: GeneMark-ETP significantly improves the accuracy of automatic annotation of large eukaryotic genomes
Source: HighWire-hosted journal article supplement (doi:10.1101/gr.278373.123), 2024-05-01
Supplement: Supplemental_Table_S6.xlsx [file Supplemental_Table_S6.xlsx]

## Sheet: Supplemental_Table_S6
Supplemental Table S6. The BUSCO scores for the GeneMark-ETP predictions made with the ‘Order excluded’ databases and for genes annotated in RefSeq. If a protein-coding gene had alternative CDSs, the longest CDS was selected for the analysis. The BUSCO database version odb10 and the BUSCO software version 5.5.0 were used.
	Species	BUSCO database lineage name	Number of gene models in the BUSCO database	BUSCO score for GeneMark-ETP gene predictions	BUSCO score for the genes annotated in RefSeq
	C. elegans	nematoda	3131	0.989	1
	A. thaliana	brassicales	4596	0.99	0.999
	D. melanogaster	diptera	3285	0.972	0.998
	S. lycopersicum	solanales	5950	0.982	0.99
	D. rerio	actinopterygii	3640	0.948	0.987
	G. gallus	aves	8338	0.959	0.98
	M. musculus	glires	13798	0.926	0.995
