# Supplementary material for: GeneMark-ETP significantly improves the accuracy of automatic annotation of large eukaryotic genomes
Source: HighWire-hosted journal article supplement (doi:10.1101/gr.278373.123), 2024-05-01
Supplement: Supplemental_Table_S7.xlsx [file Supplemental_Table_S7.xlsx]

## Sheet: Supplemental_Table_S7
Supplemental Table S7. Genomic sequences (assembly versions) and genome annotations that were used in the computational experiments. Additional details for C. elegance, D. melanogaster, and S. lycopersicum annotations are as follows. Both NCBI and Ensemble adapted C. elegance annotation from Wormbase. We specifically used the Wormbase version WS284 (Feb 2022). Both NCBI and Ensemble adapted D. me…
	Species	Assembly version	Annotation 1	Annotation 2
	C. elegans	GCF_000002985.6	NCBI RefSeq (adopted from Wormbase)	Ensembl (adopted from Wormbase)
	A. thaliana	GCF_000001735.4	NCBI RefSeq (adopted from Araport11)	EnsemblPlants (adopted from Araport11)
	D. melanogaster	GCF_000001215.4	NCBI RefSeq (adopted from FlyBase)	Ensembl (adopted from FlyBase)
	S. lycopersicum	GCF_000188115.4	NCBI RefSeq release 103	Ensemble (adopted from ITAG)
	D. rerio	GCF_000002035.6	NCBI RefSeq release 106	Ensembl GRCz11.105
	G. gallus	GCF_000002315.6	NCBI RefSeq release 104	Ensembl GRCg6a.105
	M. musculus	GCF_000001635.27	NCBI RefSeq release 109	Ensembl release 109
