# Supplementary material for: GeneMark-ETP significantly improves the accuracy of automatic annotation of large eukaryotic genomes
Source: HighWire-hosted journal article supplement (doi:10.1101/gr.278373.123), 2024-05-01
Supplement: Supplemental_Table_S8.xlsx [file Supplemental_Table_S8.xlsx]

## Sheet: Supplemental_Table_S8
Supplemental Table S8. Selection of species from OrthoDB v10.1. Numbers in bold black font show the number of species in the largest OrthoDB segment, IP0, considered for a given species. Numbers in bold blue font show the number of species excluded from IP0 in the ‘Order excluded’ segment of OrthoDB. The ‘Species excluded’ segment of OrthoDB comprises all proteins in IP0 but those from the specie…
	Species	# of species in the OrthoDB clade						Name of the OrthoDB segment	# of proteins in the OrthoDB segment (M)
		Genus	Family	Order	Class	Phylum	Kingdom
	C. elegans	3	3	5	6	7	448	Metazoa	8.3
	A. thaliana	2	8	10	-	100	117	Plantae	3.5
	D. melanogaster	20	20	56	148	170	-	Arthropoda	2.6
	S. lycopersicum	2	10	11	-	100	117	Plantae	3.5
	D. rerio	1	5	5	50	246	-	Chordata	5
	G. gallus	1	3	4	62	246	-	Chordata	5
	M. musculus	3	5	20	111	-	-	Mammalia	2.3
