# Supplementary material for: GeneMark-ETP significantly improves the accuracy of automatic annotation of large eukaryotic genomes
Source: HighWire-hosted journal article supplement (doi:10.1101/gr.278373.123), 2024-05-01
Supplement: Supplemental_Table_S9.xlsx [file Supplemental_Table_S9.xlsx]

## Sheet: Supplemental_Table_S9
Supplemental Table S9. The RNA-seq libraries used for the computational experiments.
	Species	RNA-Seq library ID	Number of paired reads (M)	Read length (nt)	Library size (Gb)
	C. elegans	SRR065717	29.1	76	4.4
		SRR065719	73.3	76	11.1
		SRR473298	19.9	100	4
		SRR2054452	10.2	100	2
		Total	132.5		21.5
	A.thaliana	SRR934391	20	101	4
		SRR5588566	24.7	125	6.2
		SRR7169927	19.2	101	3.9
		Total	63.9		14.1
	D. melanogaster	SRR023505	8.4	76	1.3
		SRR023546	8.9	76	1.4
		SRR023608	11.9	76	1.8
		SRR026433	22.1	76	3.4
		SRR027108	7.2	76	1.1
		Total	58.5		9
	S. lycopersicum	SRR2002284	56.2	73	8.2
		SRR7959012	25.4	149	7.6
		SRR7959019	27.9	149	8.3
		SRR14055940	21.2	150	6.4
		Total	130.7		30.5
	D. rerio	SRR9735169	28.2	75	4.2
		SRR10004226	21.6	150	6.5
		SRR10040127	25.9	126	6.5
		Total	75.7		17.2
	G. gallus	ERR2812450	44.9	150	13.5
		SRR3971633	24	100	4.8
		SRR6337028	10	100	2
		SRR11038071	16.4	151	5
		Total	95.3		25.3
	M. musculus	SRR567480	155.7	101	31.5
		SRR567482	161.1	101	32.5
		SRR567497	94.3	101	19
		Total	411.1		83
