# Supplementary material for: GeneMark-ETP significantly improves the accuracy of automatic annotation of large eukaryotic genomes
Source: HighWire-hosted journal article supplement (doi:10.1101/gr.278373.123), 2024-05-01
Supplement: Supplemental_Table_S10.xlsx [file Supplemental_Table_S10.xlsx]

## Sheet: Supplemental_Table_S10
Supplemental Table S10. The Sn and Pr of the predicted HC CDSs, complete and partial, are shown for the ‘Order excluded’ and for the ‘Species excluded’ databases (see Data Sets). The values of Sn and Pr are determined for i/ a set of initial CDSs predictions inferred from GeneMarkS-T predictions made in transcripts and ii/ a set of high-confidence (HC) CDSs, the output of GeneMarkS-TP. The Sn and…
	Species		GeneMarkS-T predictions		HC genes (processed by GeneMarkS-TP)
					Order excluded DB		Species excluded DB
			Complete	Partial	Complete	Partial	Complete	Partial
	C. elegans	Sn	42.9	3.9	33.6	2.1	47.7	4
		Pr	82	18.2	88.8	81.5	91.5	80.7
	A. thaliana	Sn	49.8	1.4	55.6	1.1	57.3	1.6
		Pr	89.1	17	97.4	92.3	97.8	90.8
	D. melanogaster	Sn	56.4	3.2	53.3	1.8	60.6	3.1
		Pr	87.5	38.1	95	85.3	96.9	85
	S. lycopersicum	Sn	66.3	1.4	73.7	1.3	74.2	1.5
		Pr	84.1	26.6	95.4	87.2	95.4	84.8
	D. rerio	Sn	55.3	4.3	62.8	4.2	62.4	4.5
		Pr	68.4	32.8	89.7	78.9	92.8	75.3
	G. gallus	Sn	43.9	5.7	67.9	6.5	66.3	7.7
		Pr	64	23	89.5	86.1	90	80.3
	M. musculus	Sn	48.4	1.2	60.8	2.7	60.5	3.4
		Pr	80.4	9.6	95.1	68	96.7	69.8
