# Supplementary material for: GeneMark-ETP significantly improves the accuracy of automatic annotation of large eukaryotic genomes
Source: HighWire-hosted journal article supplement (doi:10.1101/gr.278373.123), 2024-05-01
Supplement: Supplemental_Table_S11.xlsx [file Supplemental_Table_S11.xlsx]

## Sheet: Supplemental_Table_S11
Supplemental Table S11. The values of the genome-specific masking penalty parameter q (in natural logarithms). The optimal q value was determined for each GC bin for GC-heterogeneous genomes.
		Order excluded DB			Species excluded DB
	C. elegans	0.06			0.05
	A. thaliana	0.03			0.03
	D. melanogaster	0.08			0.08
	S. lycopersicum	0.04			0.04
	D. rerio	0.08			0.09
	GC	Low	Medium	High	Low	Medium	High
	G. gallus	0.15	0.17	0.12	0.14	0.16	0.11
	M. musculus	0.13	0.14	0.14	0.14	0.14	0.14
