# Supplementary figures and images for: GeneMark-ETP significantly improves the accuracy of automatic annotation of large eukaryotic genomes (part 1 of 2)
Source: HighWire-hosted journal article supplement (doi:10.1101/gr.278373.123), 2024-05-01

*Arabidopsis thaliana*

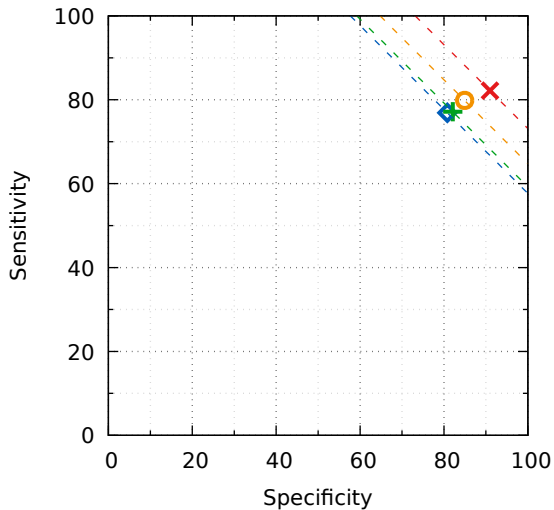

Supplement: Supplemental_Code.zip [file GM.Arabidopsis_thaliana.order.Exon.pdf › Supplemental_Code/Arabidopsis_thaliana/acc_figures/GM.Arabidopsis_thaliana.order.Exon.pdf]

*Arabidopsis thaliana*

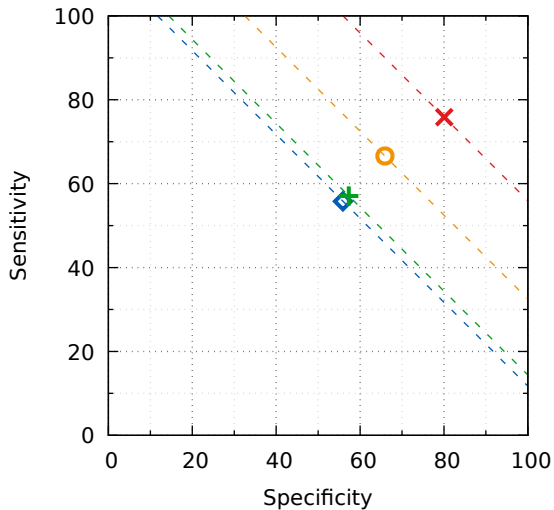

Supplement: Supplemental_Code.zip [file GM.Arabidopsis_thaliana.order.Gene.pdf › Supplemental_Code/Arabidopsis_thaliana/acc_figures/GM.Arabidopsis_thaliana.order.Gene.pdf]

*Arabidopsis thaliana*

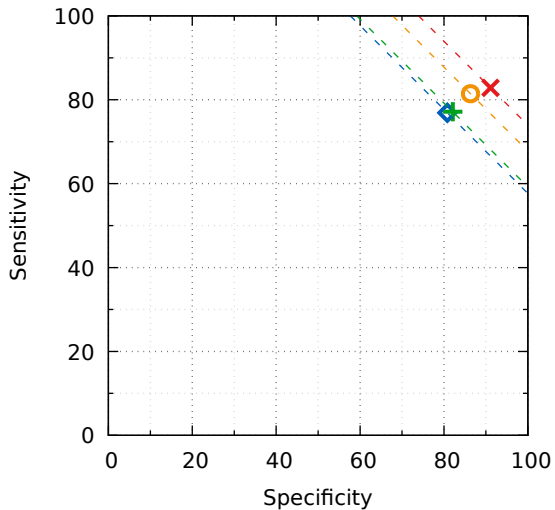

Supplement: Supplemental_Code.zip [file GM.Arabidopsis_thaliana.species.Exon.pdf › Supplemental_Code/Arabidopsis_thaliana/acc_figures/GM.Arabidopsis_thaliana.species.Exon.pdf]

*Arabidopsis thaliana*

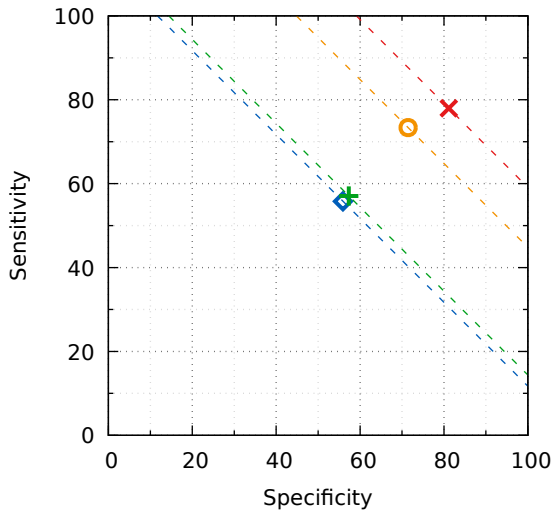

Supplement: Supplemental_Code.zip [file GM.Arabidopsis_thaliana.species.Gene.pdf › Supplemental_Code/Arabidopsis_thaliana/acc_figures/GM.Arabidopsis_thaliana.species.Gene.pdf]

*Arabidopsis thaliana*

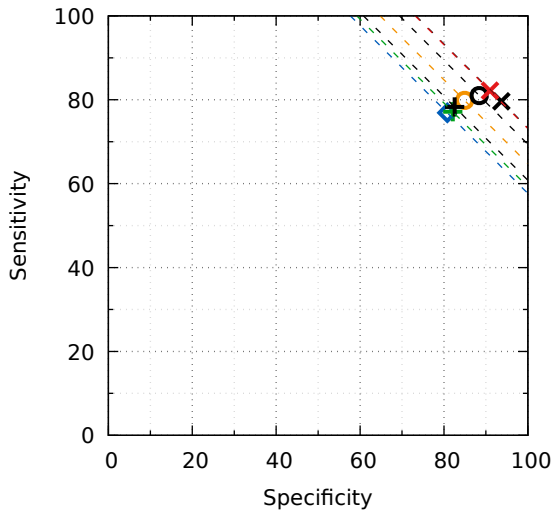

Supplement: Supplemental_Code.zip [file all.Arabidopsis_thaliana.order.Exon.pdf › Supplemental_Code/Arabidopsis_thaliana/acc_figures/all.Arabidopsis_thaliana.order.Exon.pdf]

*Arabidopsis thaliana*

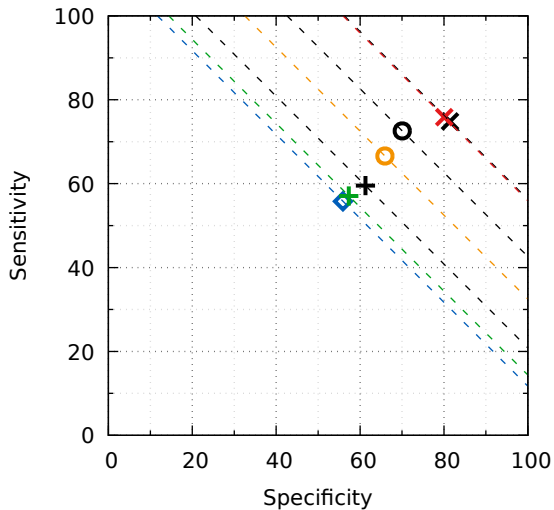

Supplement: Supplemental_Code.zip [file all.Arabidopsis_thaliana.order.Gene.pdf › Supplemental_Code/Arabidopsis_thaliana/acc_figures/all.Arabidopsis_thaliana.order.Gene.pdf]

*Arabidopsis thaliana*

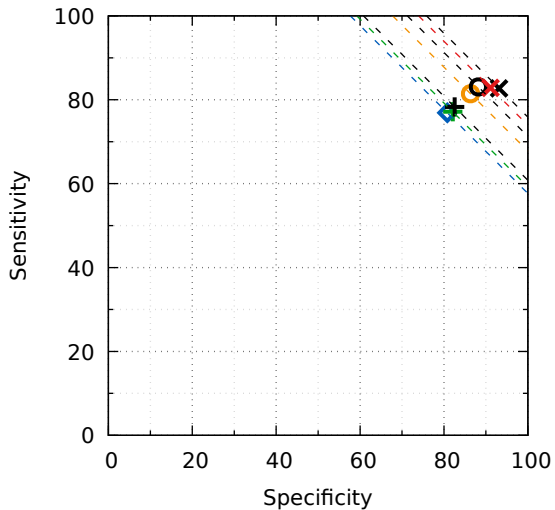

Supplement: Supplemental_Code.zip [file all.Arabidopsis_thaliana.species.Exon.pdf › Supplemental_Code/Arabidopsis_thaliana/acc_figures/all.Arabidopsis_thaliana.species.Exon.pdf]

*Arabidopsis thaliana*

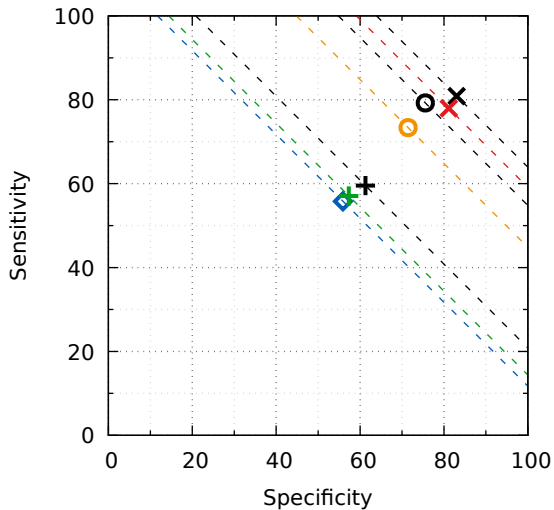

Supplement: Supplemental_Code.zip [file all.Arabidopsis_thaliana.species.Gene.pdf › Supplemental_Code/Arabidopsis_thaliana/acc_figures/all.Arabidopsis_thaliana.species.Gene.pdf]

*Arabidopsis thaliana*

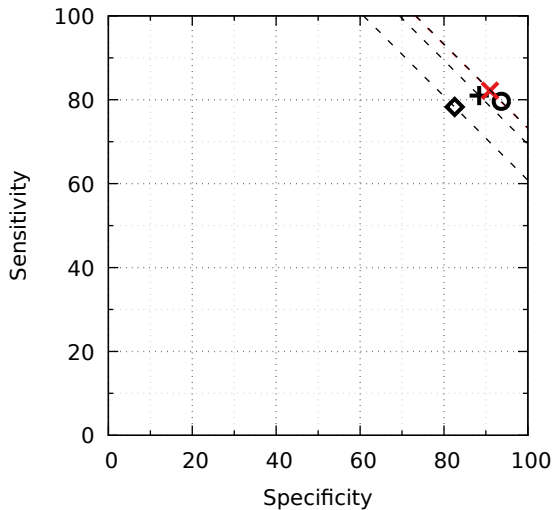

Supplement: Supplemental_Code.zip [file tsebra.Arabidopsis_thaliana.order.Exon.pdf › Supplemental_Code/Arabidopsis_thaliana/acc_figures/tsebra.Arabidopsis_thaliana.order.Exon.pdf]

*Arabidopsis thaliana*

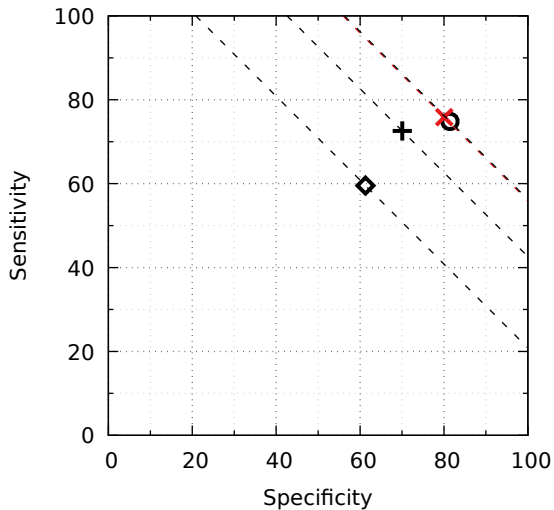

Supplement: Supplemental_Code.zip [file tsebra.Arabidopsis_thaliana.order.Gene.pdf › Supplemental_Code/Arabidopsis_thaliana/acc_figures/tsebra.Arabidopsis_thaliana.order.Gene.pdf]

*Arabidopsis thaliana*

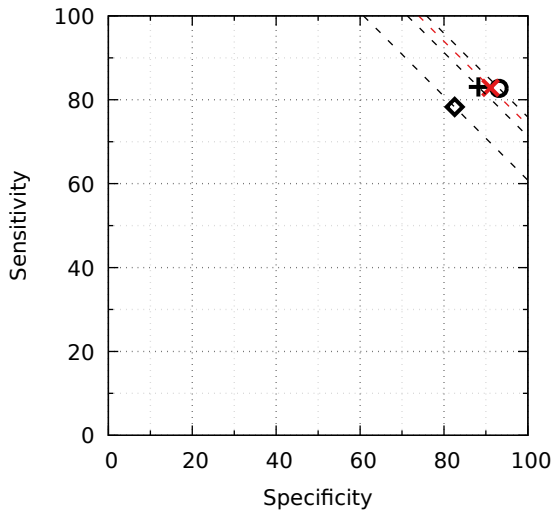

Supplement: Supplemental_Code.zip [file tsebra.Arabidopsis_thaliana.species.Exon.pdf › Supplemental_Code/Arabidopsis_thaliana/acc_figures/tsebra.Arabidopsis_thaliana.species.Exon.pdf]

*Arabidopsis thaliana*

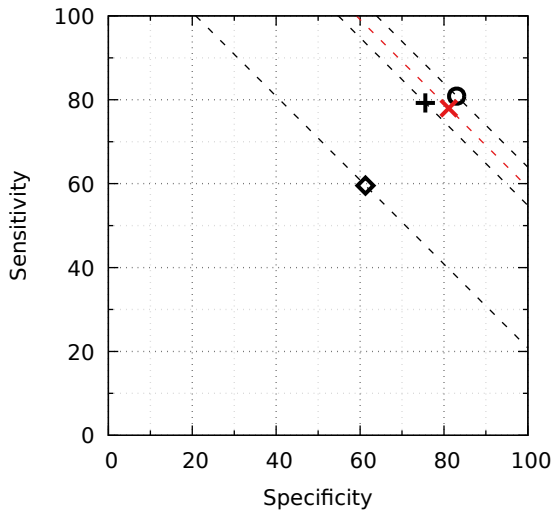

Supplement: Supplemental_Code.zip [file tsebra.Arabidopsis_thaliana.species.Gene.pdf › Supplemental_Code/Arabidopsis_thaliana/acc_figures/tsebra.Arabidopsis_thaliana.species.Gene.pdf]

*Caenorhabditis elegans*

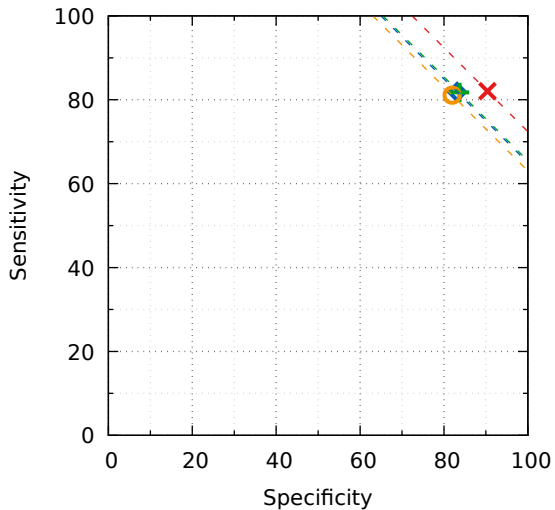

Supplement: Supplemental_Code.zip [file GM.Caenorhabditis_elegans.order.Exon.pdf › Supplemental_Code/Caenorhabditis_elegans/acc_figures/GM.Caenorhabditis_elegans.order.Exon.pdf]

*Caenorhabditis elegans*

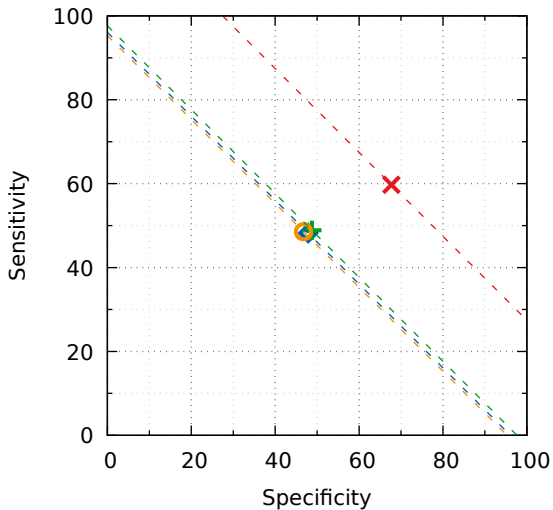

Supplement: Supplemental_Code.zip [file GM.Caenorhabditis_elegans.order.Gene.pdf › Supplemental_Code/Caenorhabditis_elegans/acc_figures/GM.Caenorhabditis_elegans.order.Gene.pdf]

*Caenorhabditis elegans*

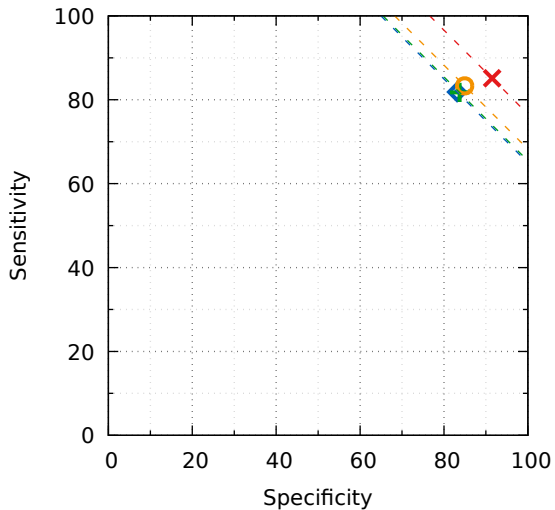

Supplement: Supplemental_Code.zip [file GM.Caenorhabditis_elegans.species.Exon.pdf › Supplemental_Code/Caenorhabditis_elegans/acc_figures/GM.Caenorhabditis_elegans.species.Exon.pdf]

*Caenorhabditis elegans*

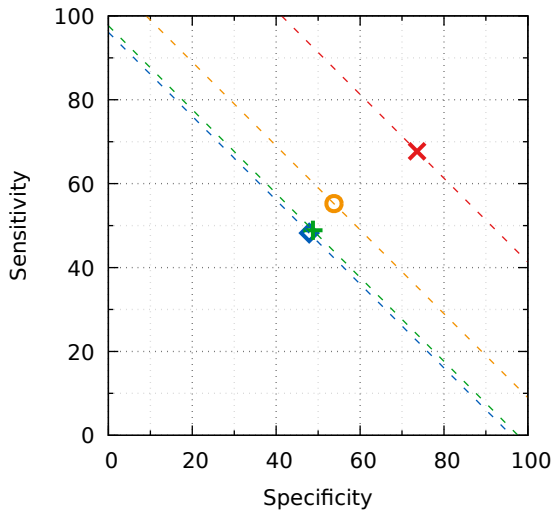

Supplement: Supplemental_Code.zip [file GM.Caenorhabditis_elegans.species.Gene.pdf › Supplemental_Code/Caenorhabditis_elegans/acc_figures/GM.Caenorhabditis_elegans.species.Gene.pdf]

*Caenorhabditis elegans*

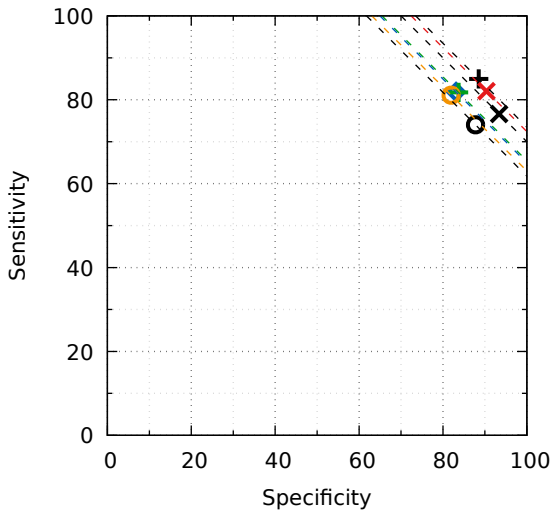

Supplement: Supplemental_Code.zip [file all.Caenorhabditis_elegans.order.Exon.pdf › Supplemental_Code/Caenorhabditis_elegans/acc_figures/all.Caenorhabditis_elegans.order.Exon.pdf]

*Caenorhabditis elegans*

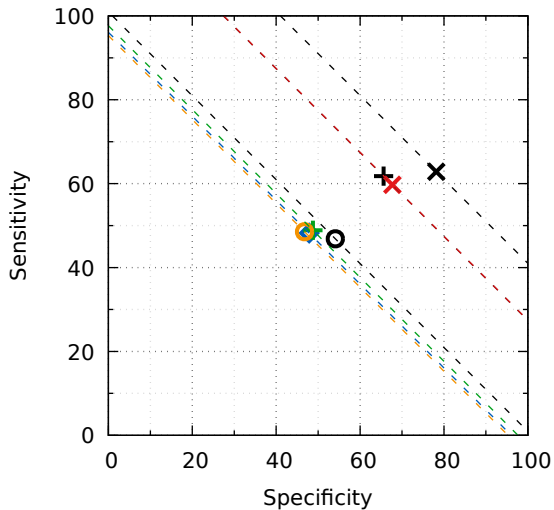

Supplement: Supplemental_Code.zip [file all.Caenorhabditis_elegans.order.Gene.pdf › Supplemental_Code/Caenorhabditis_elegans/acc_figures/all.Caenorhabditis_elegans.order.Gene.pdf]

*Caenorhabditis elegans*

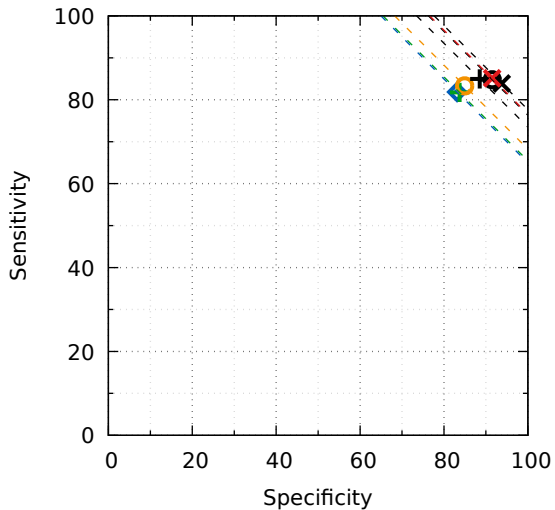

Supplement: Supplemental_Code.zip [file all.Caenorhabditis_elegans.species.Exon.pdf › Supplemental_Code/Caenorhabditis_elegans/acc_figures/all.Caenorhabditis_elegans.species.Exon.pdf]

*Caenorhabditis elegans*

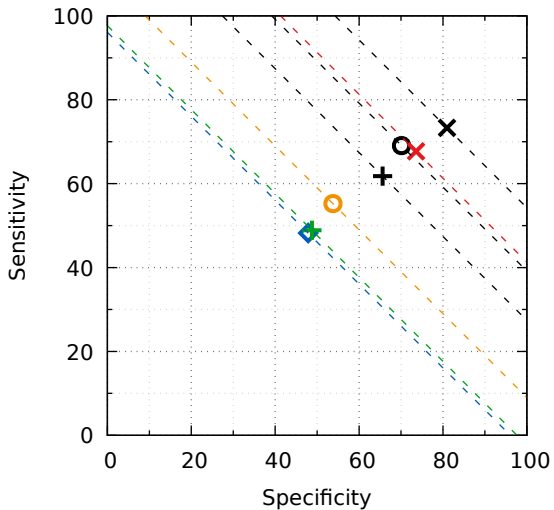

Supplement: Supplemental_Code.zip [file all.Caenorhabditis_elegans.species.Gene.pdf › Supplemental_Code/Caenorhabditis_elegans/acc_figures/all.Caenorhabditis_elegans.species.Gene.pdf]

*Caenorhabditis elegans*

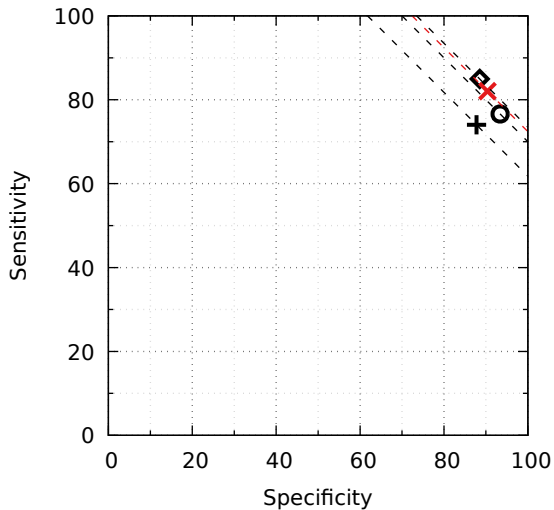

Supplement: Supplemental_Code.zip [file tsebra.Caenorhabditis_elegans.order.Exon.pdf › Supplemental_Code/Caenorhabditis_elegans/acc_figures/tsebra.Caenorhabditis_elegans.order.Exon.pdf]

*Caenorhabditis elegans*

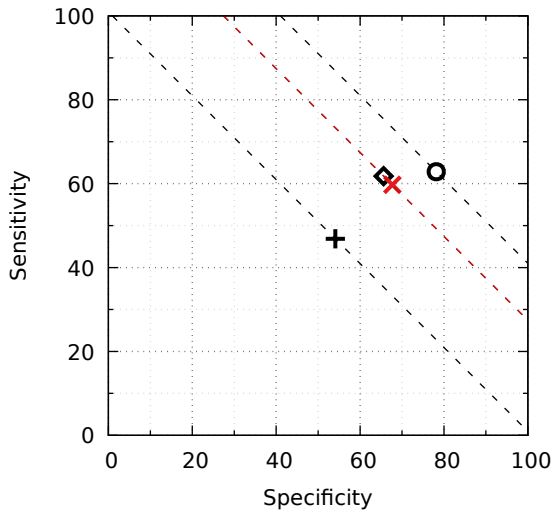

Supplement: Supplemental_Code.zip [file tsebra.Caenorhabditis_elegans.order.Gene.pdf › Supplemental_Code/Caenorhabditis_elegans/acc_figures/tsebra.Caenorhabditis_elegans.order.Gene.pdf]

*Caenorhabditis elegans*

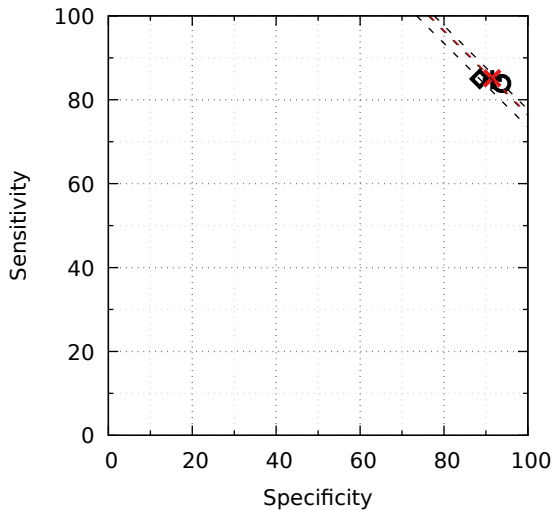

Supplement: Supplemental_Code.zip [file tsebra.Caenorhabditis_elegans.species.Exon.pdf › Supplemental_Code/Caenorhabditis_elegans/acc_figures/tsebra.Caenorhabditis_elegans.species.Exon.pdf]

*Caenorhabditis elegans*

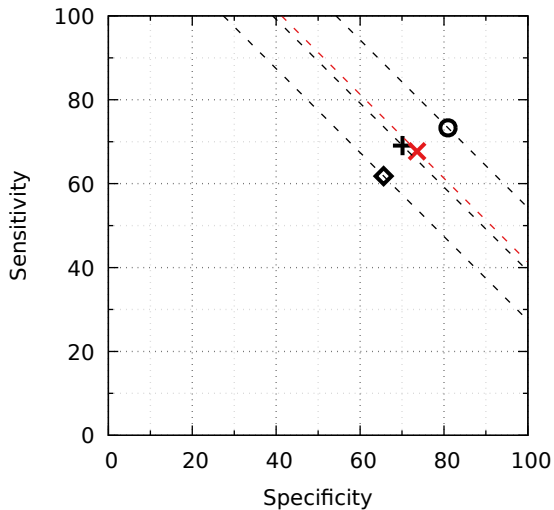

Supplement: Supplemental_Code.zip [file tsebra.Caenorhabditis_elegans.species.Gene.pdf › Supplemental_Code/Caenorhabditis_elegans/acc_figures/tsebra.Caenorhabditis_elegans.species.Gene.pdf]

*Danio rerio*

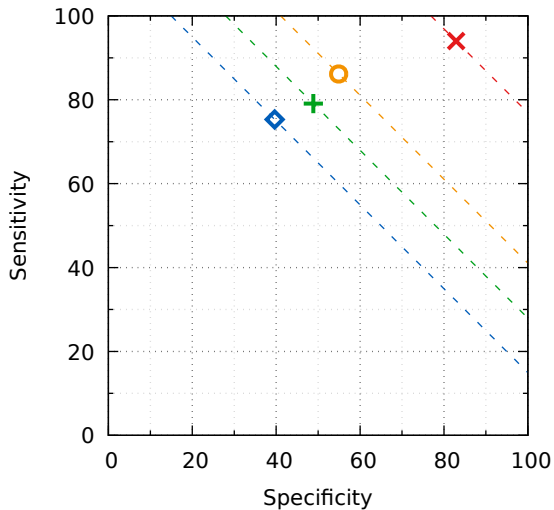

Supplement: Supplemental_Code.zip [file GM.Danio_rerio.genus.Exon.pdf › Supplemental_Code/Danio_rerio/acc_figures/GM.Danio_rerio.genus.Exon.pdf]

*Danio rerio*

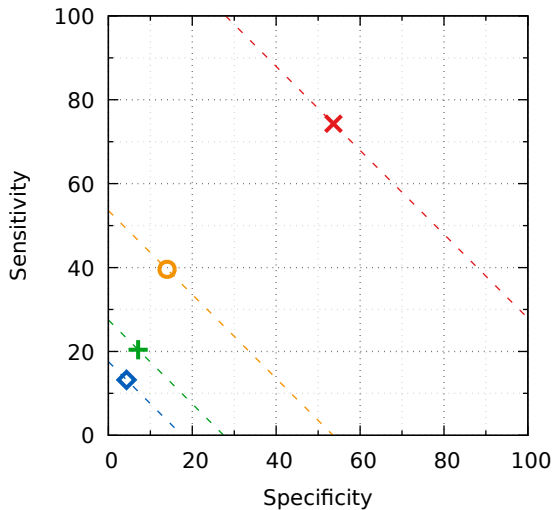

Supplement: Supplemental_Code.zip [file GM.Danio_rerio.genus.Gene.pdf › Supplemental_Code/Danio_rerio/acc_figures/GM.Danio_rerio.genus.Gene.pdf]

*Danio rerio*

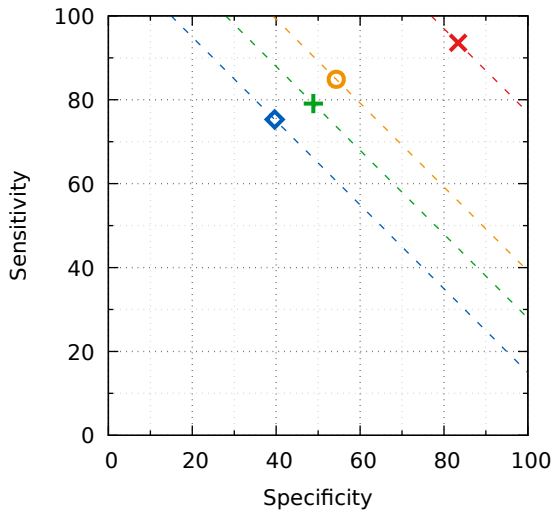

Supplement: Supplemental_Code.zip [file GM.Danio_rerio.order.Exon.pdf › Supplemental_Code/Danio_rerio/acc_figures/GM.Danio_rerio.order.Exon.pdf]

*Danio rerio*

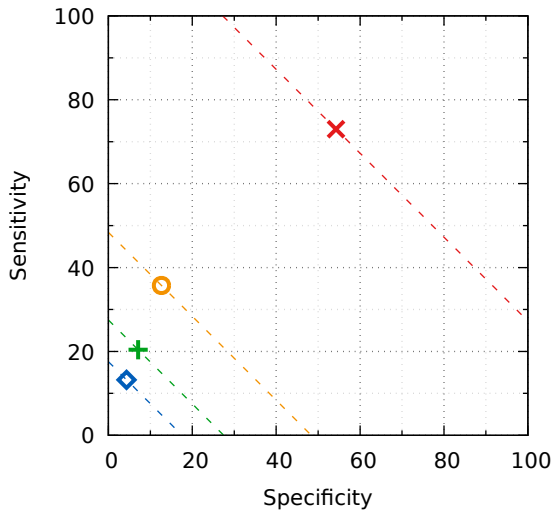

Supplement: Supplemental_Code.zip [file GM.Danio_rerio.order.Gene.pdf › Supplemental_Code/Danio_rerio/acc_figures/GM.Danio_rerio.order.Gene.pdf]

*Danio rerio*

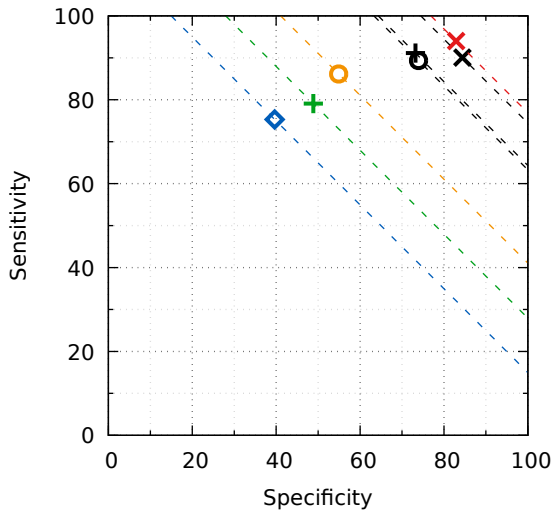

Supplement: Supplemental_Code.zip [file all.Danio_rerio.genus.Exon.pdf › Supplemental_Code/Danio_rerio/acc_figures/all.Danio_rerio.genus.Exon.pdf]

*Danio rerio*

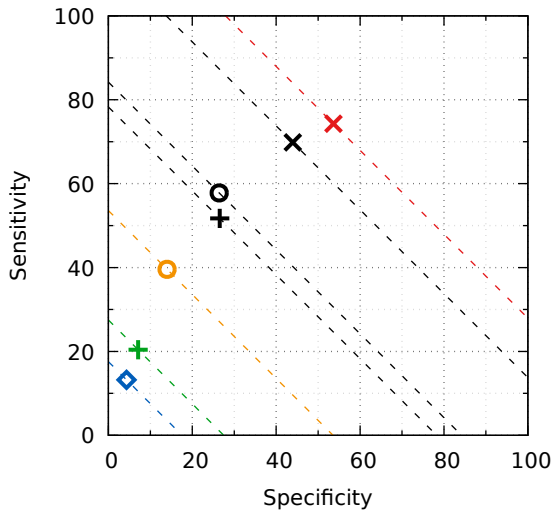

Supplement: Supplemental_Code.zip [file all.Danio_rerio.genus.Gene.pdf › Supplemental_Code/Danio_rerio/acc_figures/all.Danio_rerio.genus.Gene.pdf]

*Danio rerio*

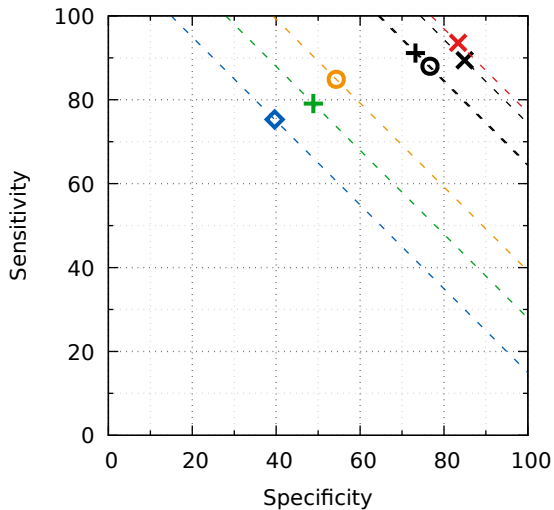

Supplement: Supplemental_Code.zip [file all.Danio_rerio.order.Exon.pdf › Supplemental_Code/Danio_rerio/acc_figures/all.Danio_rerio.order.Exon.pdf]

*Danio rerio*

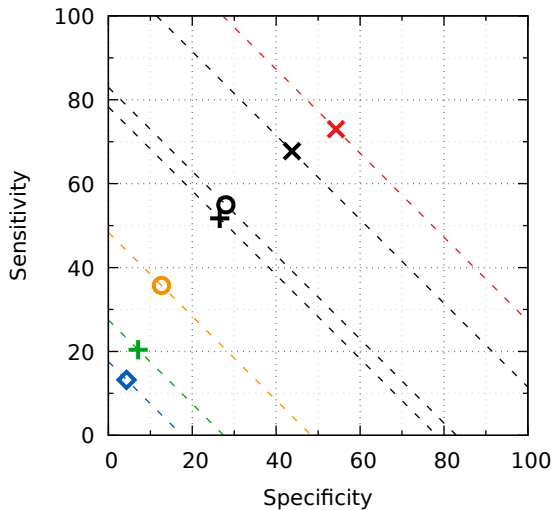

Supplement: Supplemental_Code.zip [file all.Danio_rerio.order.Gene.pdf › Supplemental_Code/Danio_rerio/acc_figures/all.Danio_rerio.order.Gene.pdf]

*Danio rerio*

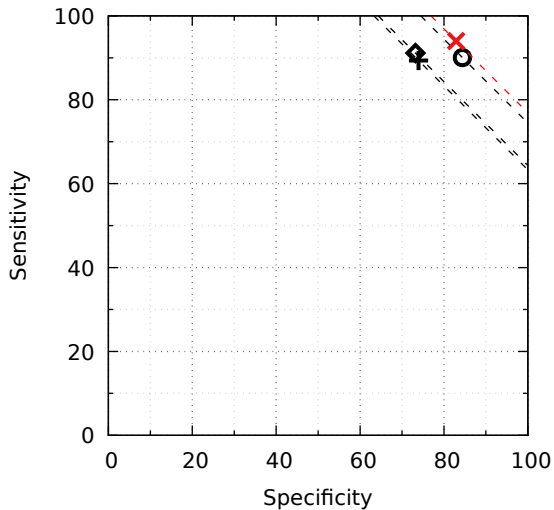

Supplement: Supplemental_Code.zip [file tsebra.Danio_rerio.genus.Exon.pdf › Supplemental_Code/Danio_rerio/acc_figures/tsebra.Danio_rerio.genus.Exon.pdf]

*Danio rerio*

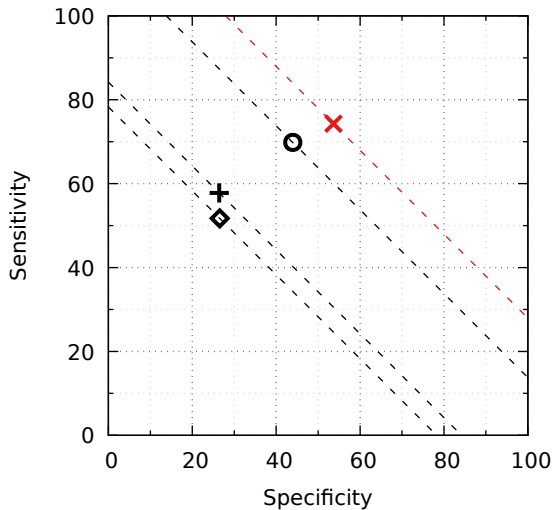

Supplement: Supplemental_Code.zip [file tsebra.Danio_rerio.genus.Gene.pdf › Supplemental_Code/Danio_rerio/acc_figures/tsebra.Danio_rerio.genus.Gene.pdf]

*Danio rerio*

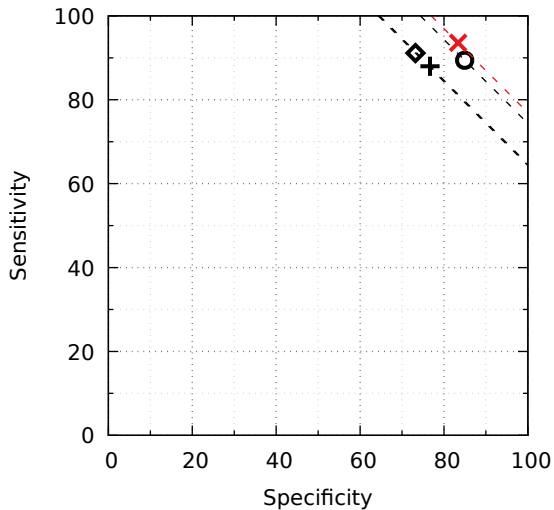

Supplement: Supplemental_Code.zip [file tsebra.Danio_rerio.order.Exon.pdf › Supplemental_Code/Danio_rerio/acc_figures/tsebra.Danio_rerio.order.Exon.pdf]

*Danio rerio*

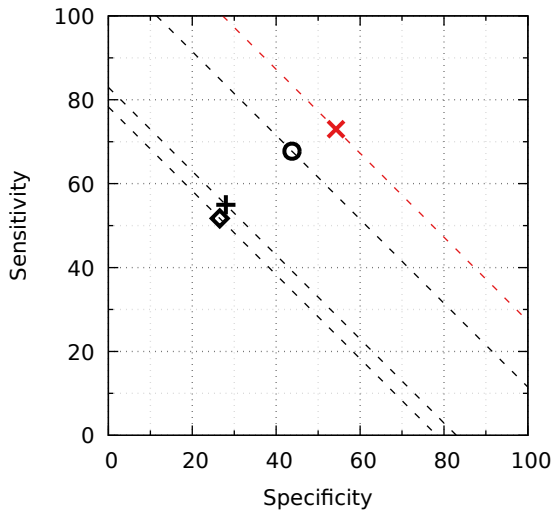

Supplement: Supplemental_Code.zip [file tsebra.Danio_rerio.order.Gene.pdf › Supplemental_Code/Danio_rerio/acc_figures/tsebra.Danio_rerio.order.Gene.pdf]

# D. rerio

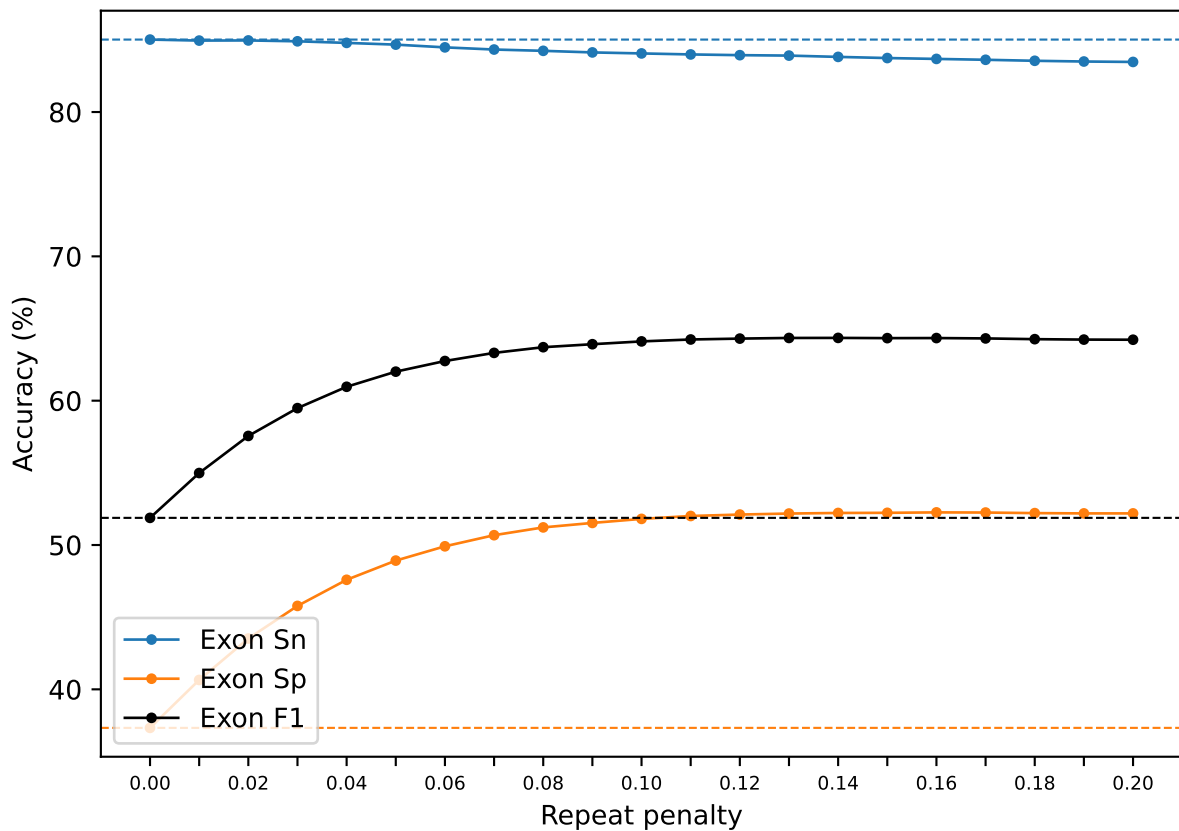

Supplement: Supplemental_Code.zip [file cds.acc.pdf › Supplemental_Code/Danio_rerio/genus_excluded.fa/maskingExperiments/penaltyPredictions/cds.acc.pdf]

# D. rerio

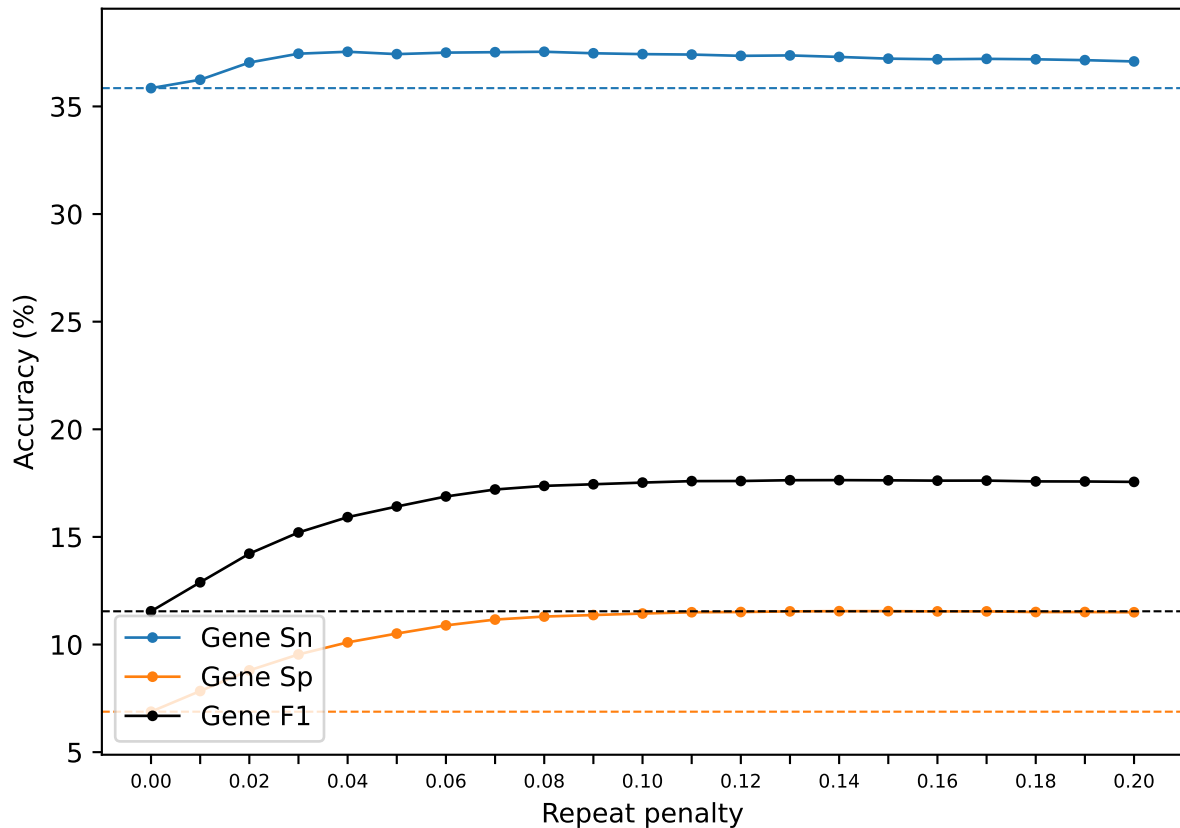

Supplement: Supplemental_Code.zip [file gene.acc.pdf › Supplemental_Code/Danio_rerio/genus_excluded.fa/maskingExperiments/penaltyPredictions/gene.acc.pdf]

# D. rerio

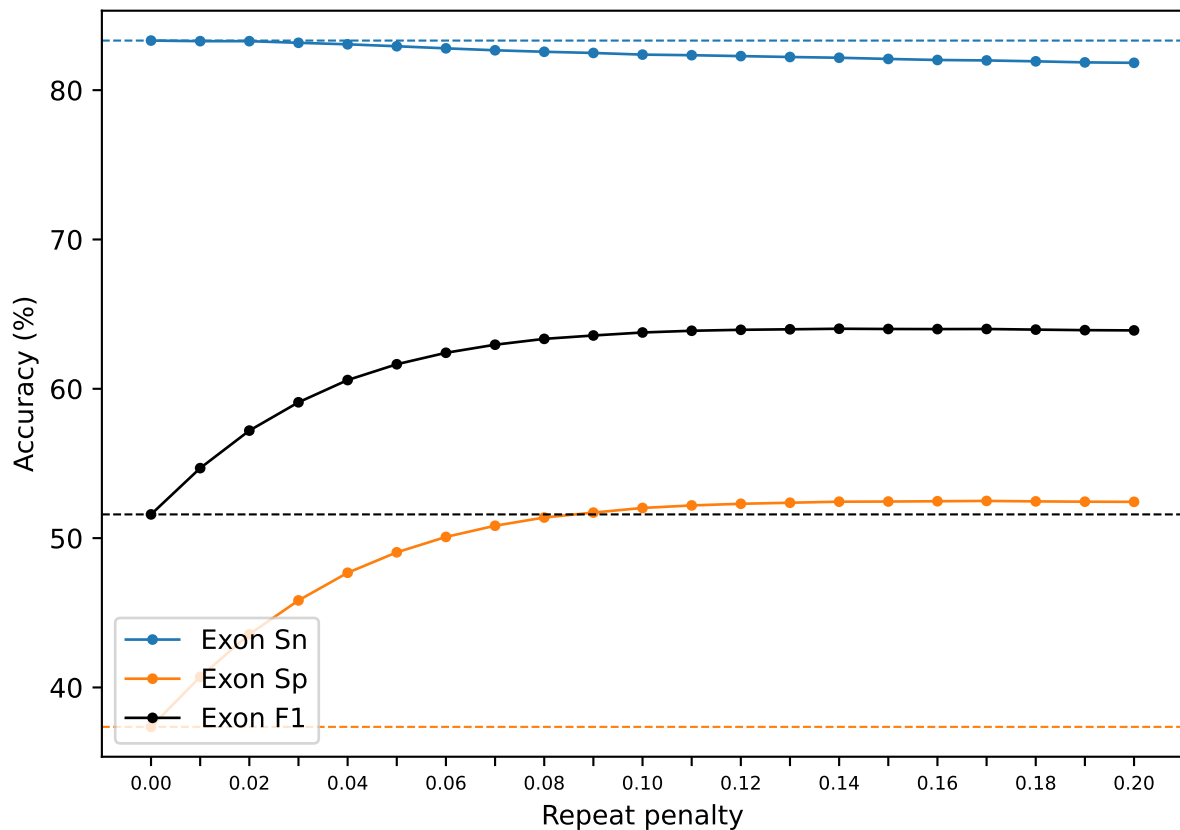

Supplement: Supplemental_Code.zip [file cds.acc.pdf › Supplemental_Code/Danio_rerio/order_excluded.fa/maskingExperiments/penaltyPredictions/cds.acc.pdf]

# D. rerio

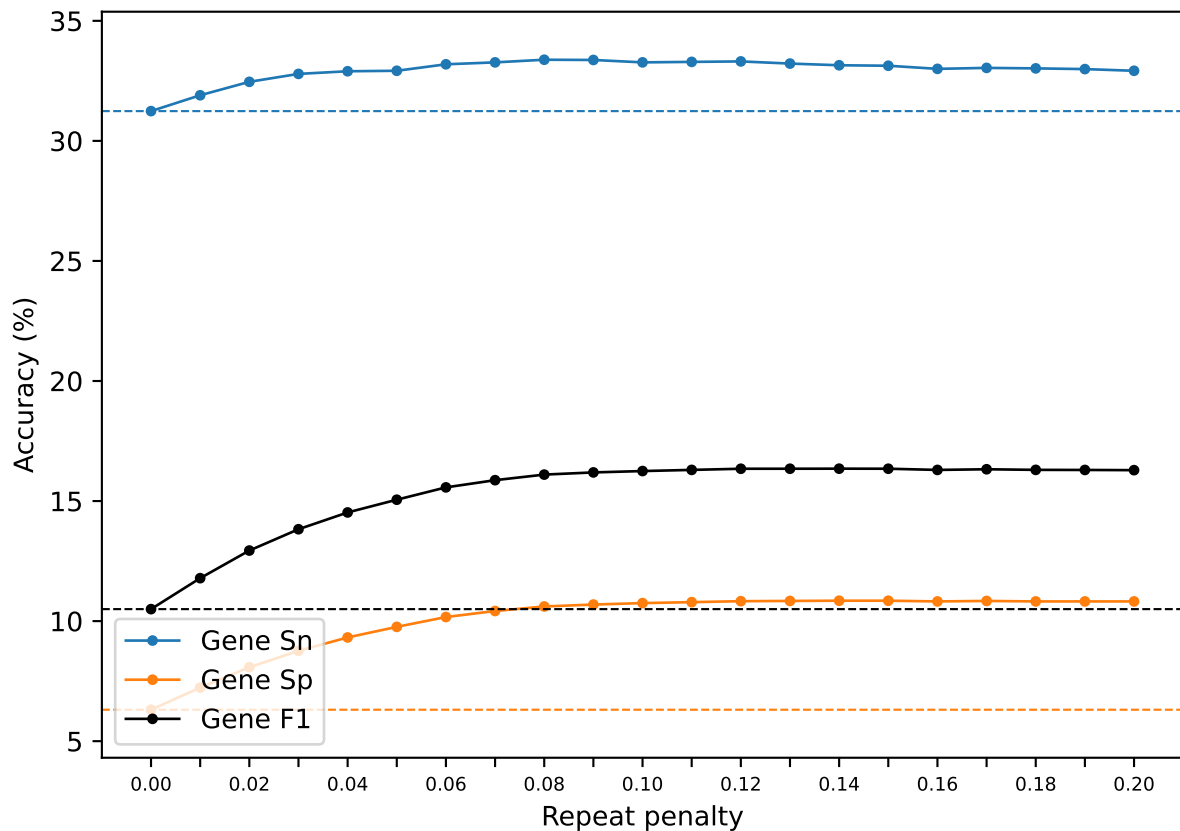

Supplement: Supplemental_Code.zip [file gene.acc.pdf › Supplemental_Code/Danio_rerio/order_excluded.fa/maskingExperiments/penaltyPredictions/gene.acc.pdf]

*Drosophila melanogaster*

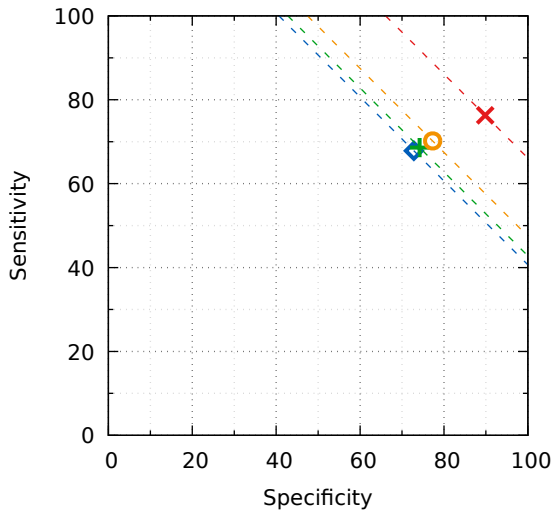

Supplement: Supplemental_Code.zip [file GM.Drosophila_melanogaster.order.Exon.pdf › Supplemental_Code/Drosophila_melanogaster/acc_figures/GM.Drosophila_melanogaster.order.Exon.pdf]

*Drosophila melanogaster*

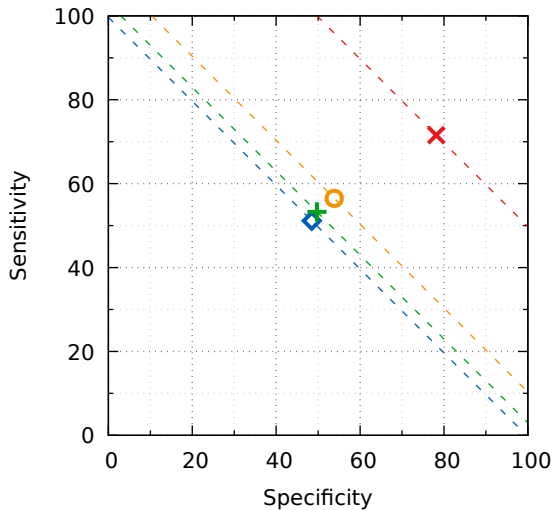

Supplement: Supplemental_Code.zip [file GM.Drosophila_melanogaster.order.Gene.pdf › Supplemental_Code/Drosophila_melanogaster/acc_figures/GM.Drosophila_melanogaster.order.Gene.pdf]

*Drosophila melanogaster*

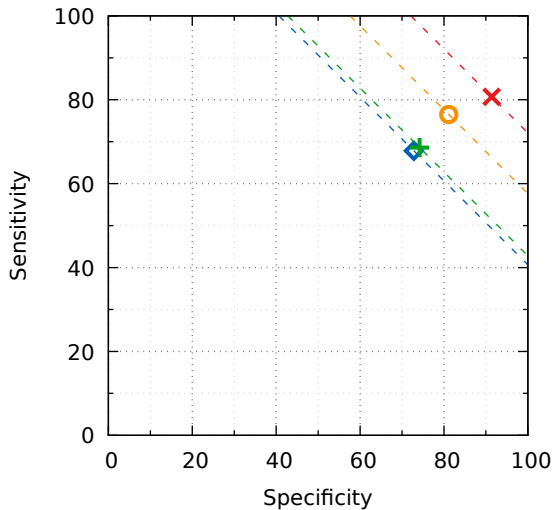

Supplement: Supplemental_Code.zip [file GM.Drosophila_melanogaster.species.Exon.pdf › Supplemental_Code/Drosophila_melanogaster/acc_figures/GM.Drosophila_melanogaster.species.Exon.pdf]

*Drosophila melanogaster*

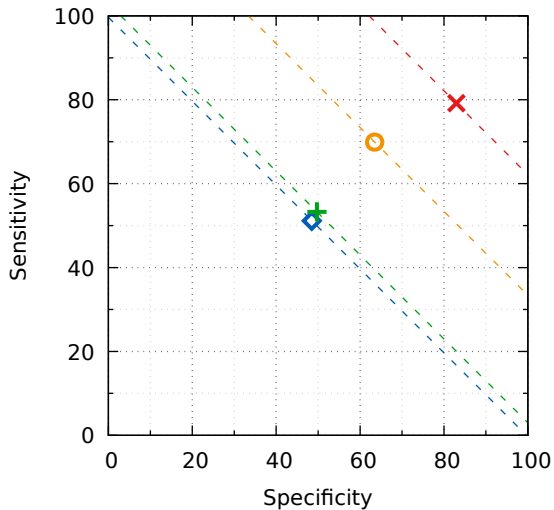

Supplement: Supplemental_Code.zip [file GM.Drosophila_melanogaster.species.Gene.pdf › Supplemental_Code/Drosophila_melanogaster/acc_figures/GM.Drosophila_melanogaster.species.Gene.pdf]

*Drosophila melanogaster*

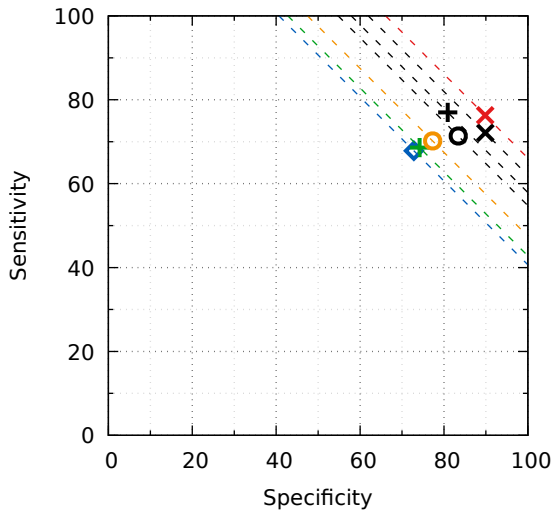

Supplement: Supplemental_Code.zip [file all.Drosophila_melanogaster.order.Exon.pdf › Supplemental_Code/Drosophila_melanogaster/acc_figures/all.Drosophila_melanogaster.order.Exon.pdf]

*Drosophila melanogaster*

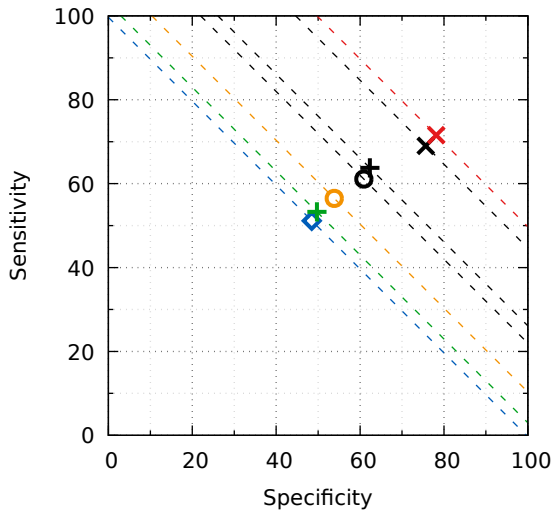

Supplement: Supplemental_Code.zip [file all.Drosophila_melanogaster.order.Gene.pdf › Supplemental_Code/Drosophila_melanogaster/acc_figures/all.Drosophila_melanogaster.order.Gene.pdf]

*Drosophila melanogaster*

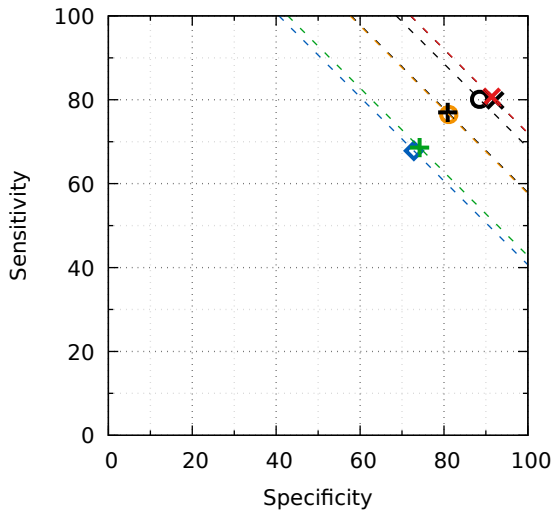

Supplement: Supplemental_Code.zip [file all.Drosophila_melanogaster.species.Exon.pdf › Supplemental_Code/Drosophila_melanogaster/acc_figures/all.Drosophila_melanogaster.species.Exon.pdf]

*Drosophila melanogaster*

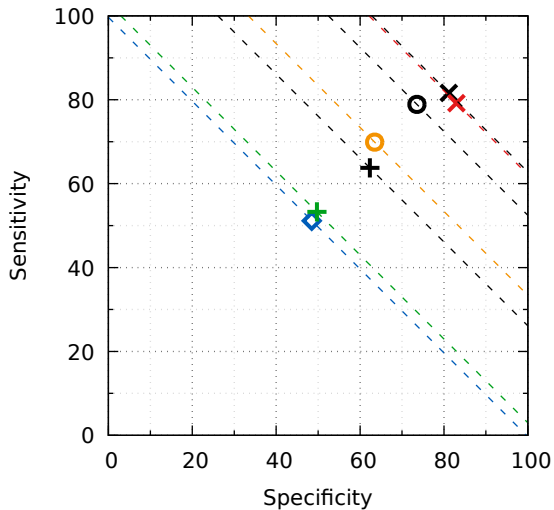

Supplement: Supplemental_Code.zip [file all.Drosophila_melanogaster.species.Gene.pdf › Supplemental_Code/Drosophila_melanogaster/acc_figures/all.Drosophila_melanogaster.species.Gene.pdf]

*Drosophila melaongaster*



Supplement: Supplemental_Code.zip [file all.Drosophila_melaongaster.species.Gene.pdf › Supplemental_Code/Drosophila_melanogaster/acc_figures/all.Drosophila_melaongaster.species.Gene.pdf]

*Drosophila melanogaster*

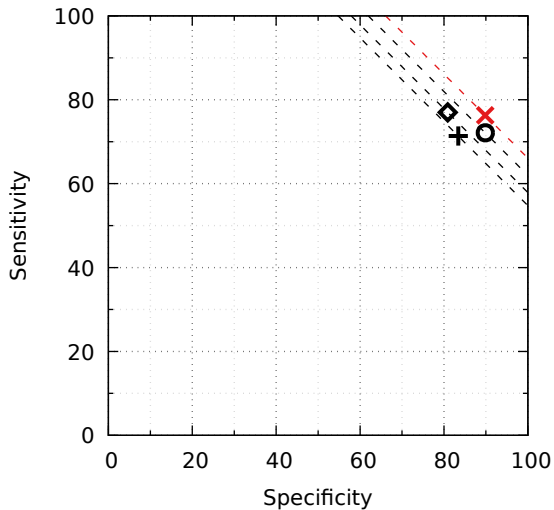

Supplement: Supplemental_Code.zip [file tsebra.Drosophila_melanogaster.order.Exon.pdf › Supplemental_Code/Drosophila_melanogaster/acc_figures/tsebra.Drosophila_melanogaster.order.Exon.pdf]

*Drosophila melanogaster*

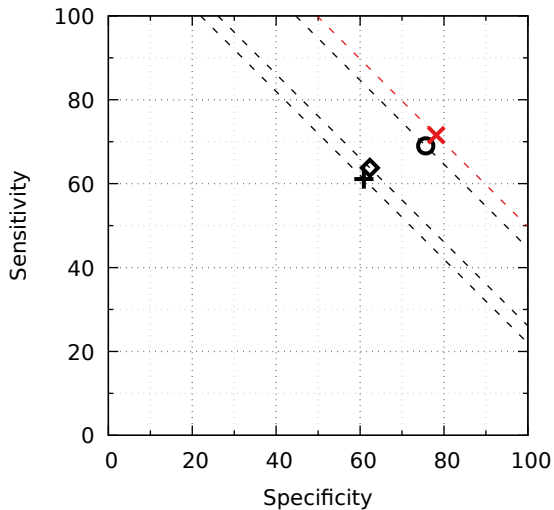

Supplement: Supplemental_Code.zip [file tsebra.Drosophila_melanogaster.order.Gene.pdf › Supplemental_Code/Drosophila_melanogaster/acc_figures/tsebra.Drosophila_melanogaster.order.Gene.pdf]

*Drosophila melanogaster*

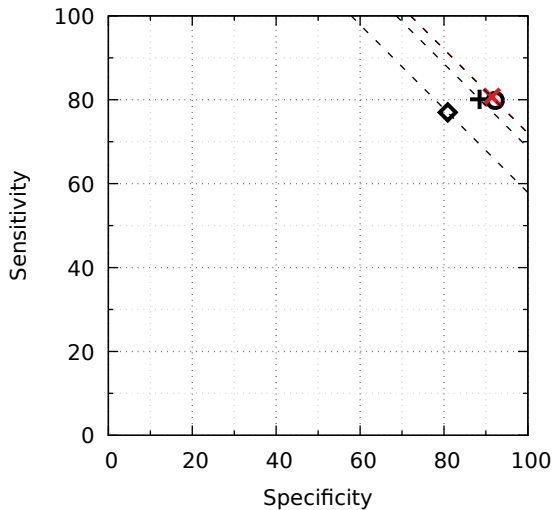

Supplement: Supplemental_Code.zip [file tsebra.Drosophila_melanogaster.species.Exon.pdf › Supplemental_Code/Drosophila_melanogaster/acc_figures/tsebra.Drosophila_melanogaster.species.Exon.pdf]

*Drosophila melanogaster*

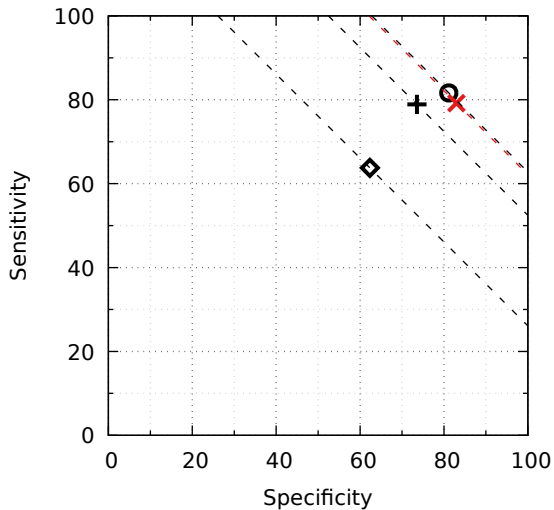

Supplement: Supplemental_Code.zip [file tsebra.Drosophila_melanogaster.species.Gene.pdf › Supplemental_Code/Drosophila_melanogaster/acc_figures/tsebra.Drosophila_melanogaster.species.Gene.pdf]

*Gallus gallus*

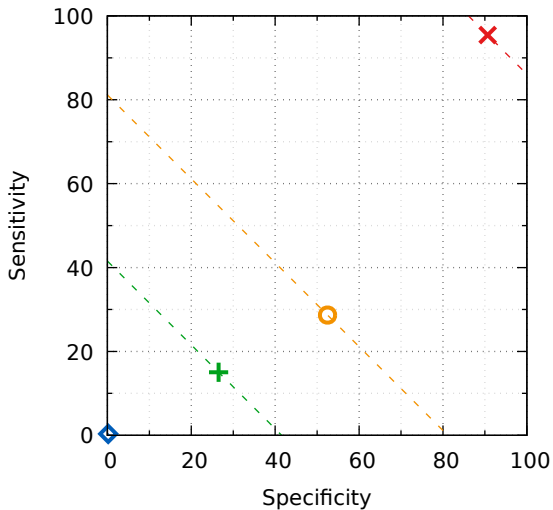

Supplement: Supplemental_Code.zip [file GM.Gallus_gallus.order.Exon.pdf › Supplemental_Code/Gallus_gallus/acc_figures/GM.Gallus_gallus.order.Exon.pdf]

*Gallus gallus*

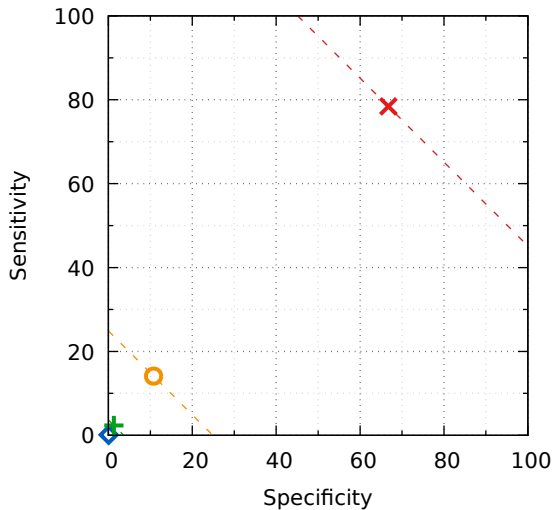

Supplement: Supplemental_Code.zip [file GM.Gallus_gallus.order.Gene.pdf › Supplemental_Code/Gallus_gallus/acc_figures/GM.Gallus_gallus.order.Gene.pdf]

*Gallus gallus*

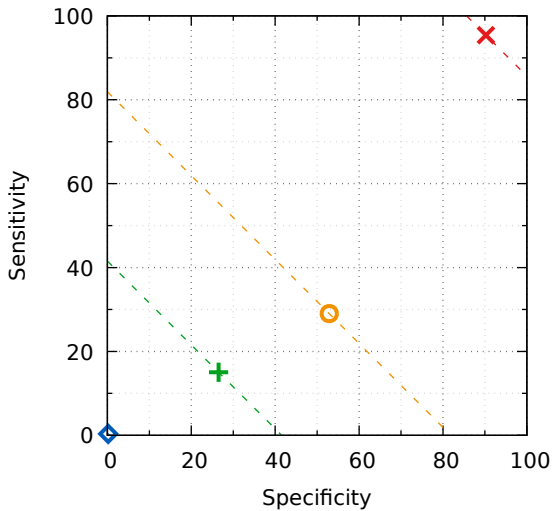

Supplement: Supplemental_Code.zip [file GM.Gallus_gallus.species.Exon.pdf › Supplemental_Code/Gallus_gallus/acc_figures/GM.Gallus_gallus.species.Exon.pdf]

*Gallus gallus*

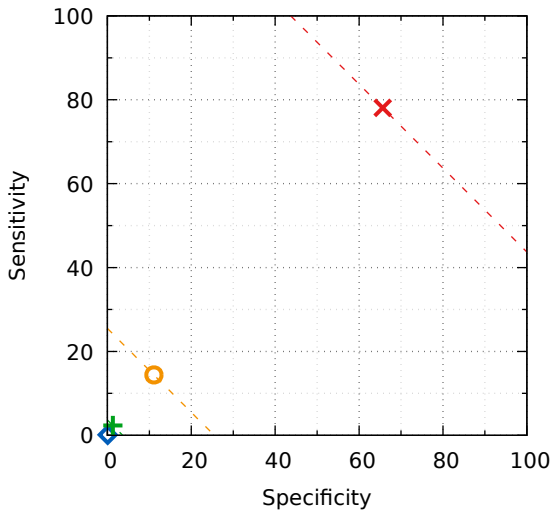

Supplement: Supplemental_Code.zip [file GM.Gallus_gallus.species.Gene.pdf › Supplemental_Code/Gallus_gallus/acc_figures/GM.Gallus_gallus.species.Gene.pdf]

*Gallus gallus*

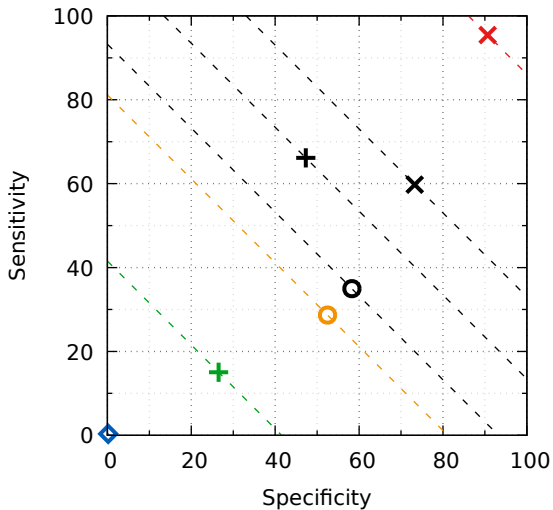

Supplement: Supplemental_Code.zip [file all.Gallus_gallus.order.Exon.pdf › Supplemental_Code/Gallus_gallus/acc_figures/all.Gallus_gallus.order.Exon.pdf]

*Gallus gallus*

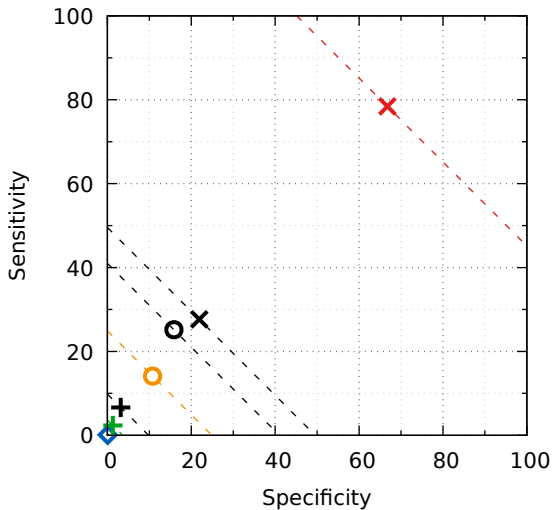

Supplement: Supplemental_Code.zip [file all.Gallus_gallus.order.Gene.pdf › Supplemental_Code/Gallus_gallus/acc_figures/all.Gallus_gallus.order.Gene.pdf]

*Gallus gallus*

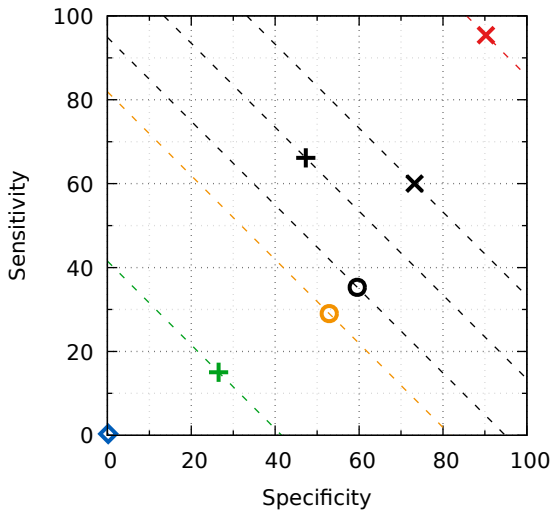

Supplement: Supplemental_Code.zip [file all.Gallus_gallus.species.Exon.pdf › Supplemental_Code/Gallus_gallus/acc_figures/all.Gallus_gallus.species.Exon.pdf]

*Gallus gallus*

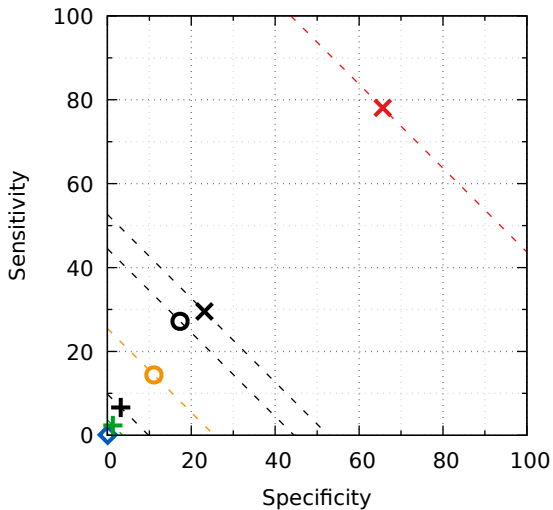

Supplement: Supplemental_Code.zip [file all.Gallus_gallus.species.Gene.pdf › Supplemental_Code/Gallus_gallus/acc_figures/all.Gallus_gallus.species.Gene.pdf]

*Gallus gallus*

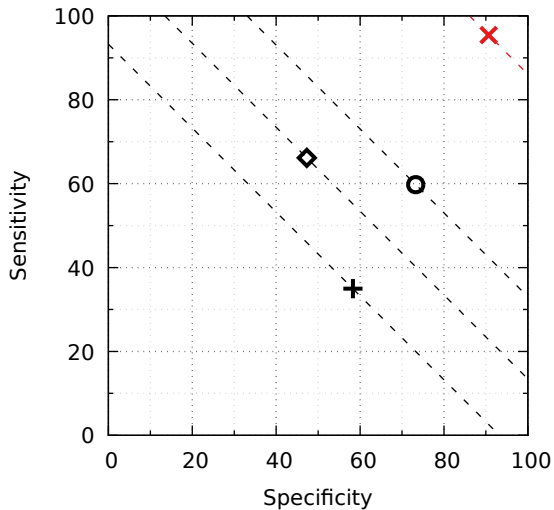

Supplement: Supplemental_Code.zip [file tsebra.Gallus_gallus.order.Exon.pdf › Supplemental_Code/Gallus_gallus/acc_figures/tsebra.Gallus_gallus.order.Exon.pdf]

*Gallus gallus*

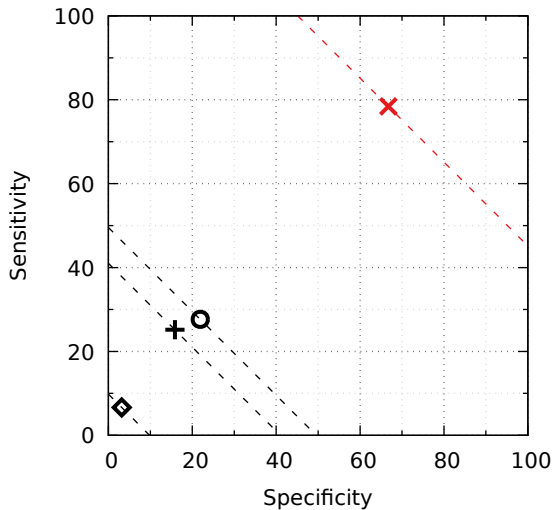

Supplement: Supplemental_Code.zip [file tsebra.Gallus_gallus.order.Gene.pdf › Supplemental_Code/Gallus_gallus/acc_figures/tsebra.Gallus_gallus.order.Gene.pdf]

*Gallus gallus*

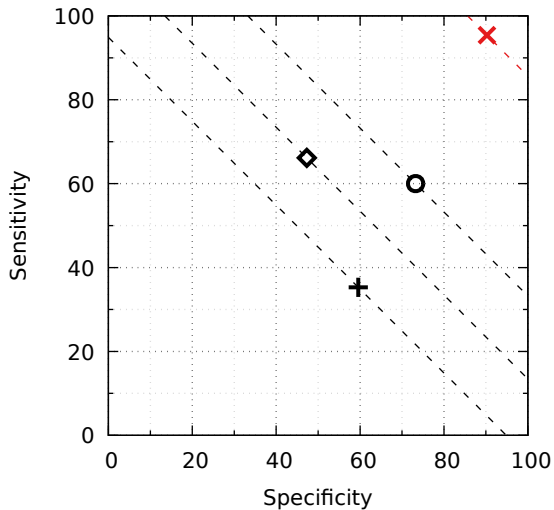

Supplement: Supplemental_Code.zip [file tsebra.Gallus_gallus.species.Exon.pdf › Supplemental_Code/Gallus_gallus/acc_figures/tsebra.Gallus_gallus.species.Exon.pdf]

*Gallus gallus*

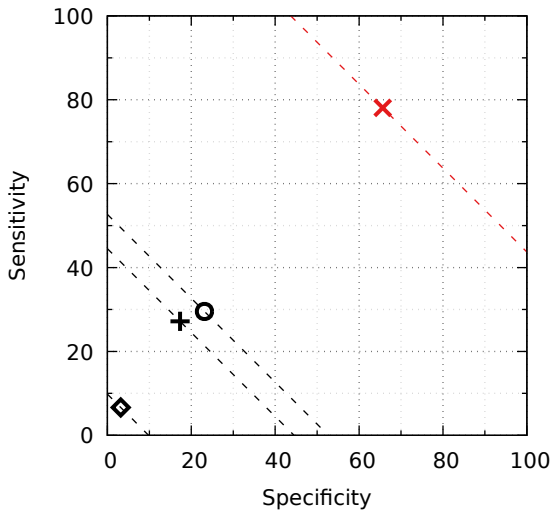

Supplement: Supplemental_Code.zip [file tsebra.Gallus_gallus.species.Gene.pdf › Supplemental_Code/Gallus_gallus/acc_figures/tsebra.Gallus_gallus.species.Gene.pdf]

# G. gallus, high GC

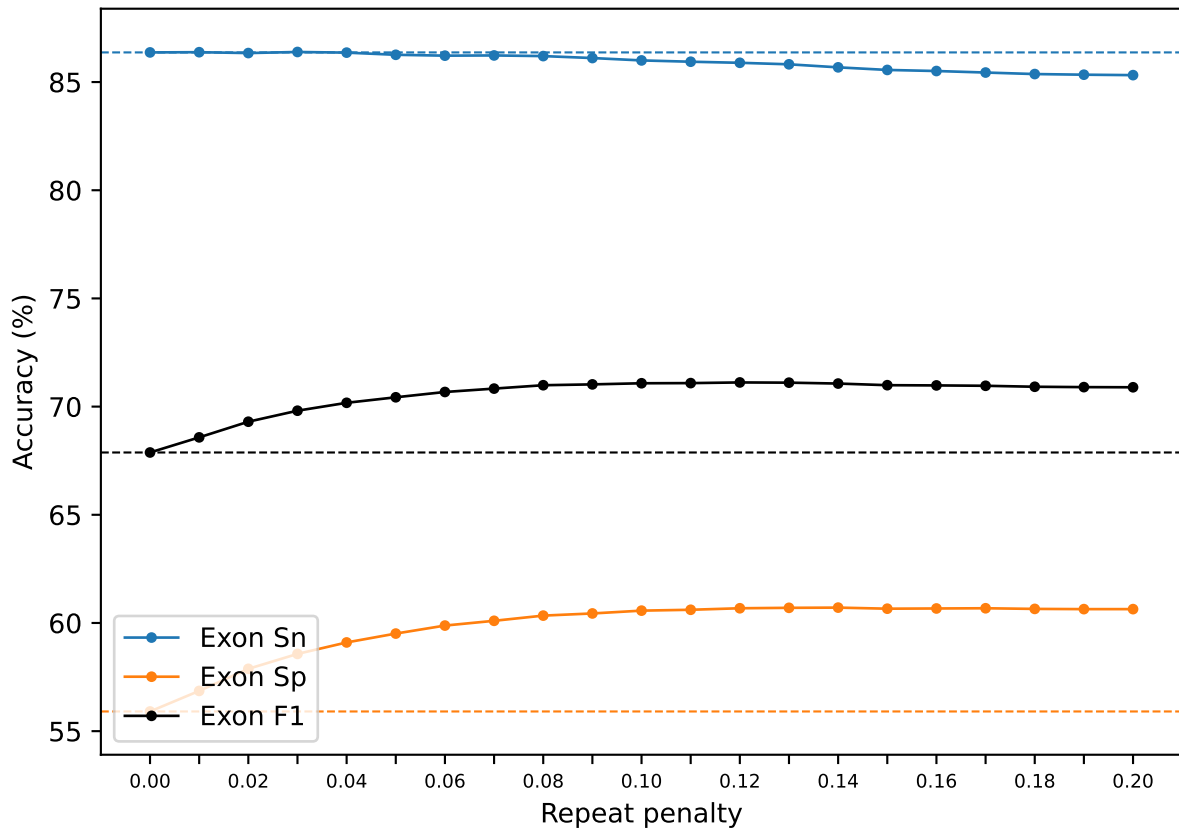

Supplement: Supplemental_Code.zip [file cds.acc.pdf › Supplemental_Code/Gallus_gallus/order_excluded.fa/maskingExperiments/high_penaltyPredictions/cds.acc.pdf]

# G. gallus, high GC

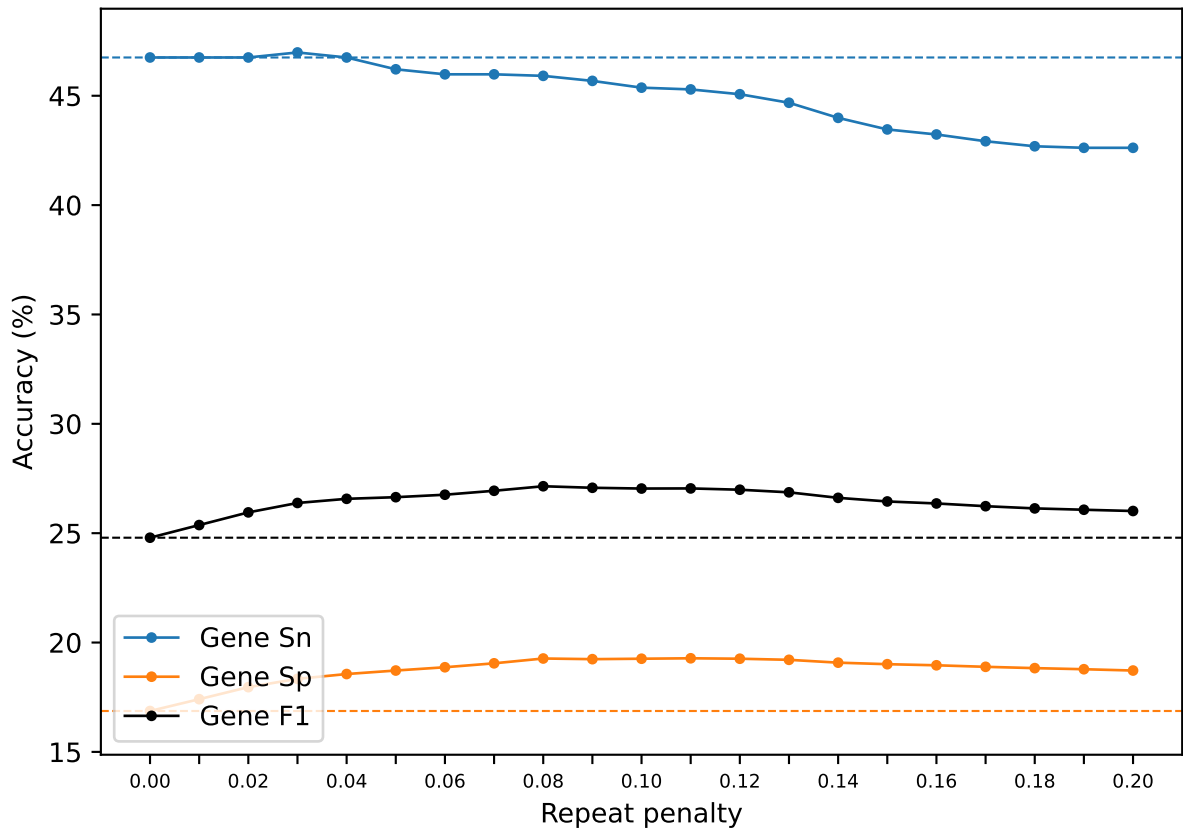

Supplement: Supplemental_Code.zip [file gene.acc.pdf › Supplemental_Code/Gallus_gallus/order_excluded.fa/maskingExperiments/high_penaltyPredictions/gene.acc.pdf]

# G. gallus, low GC

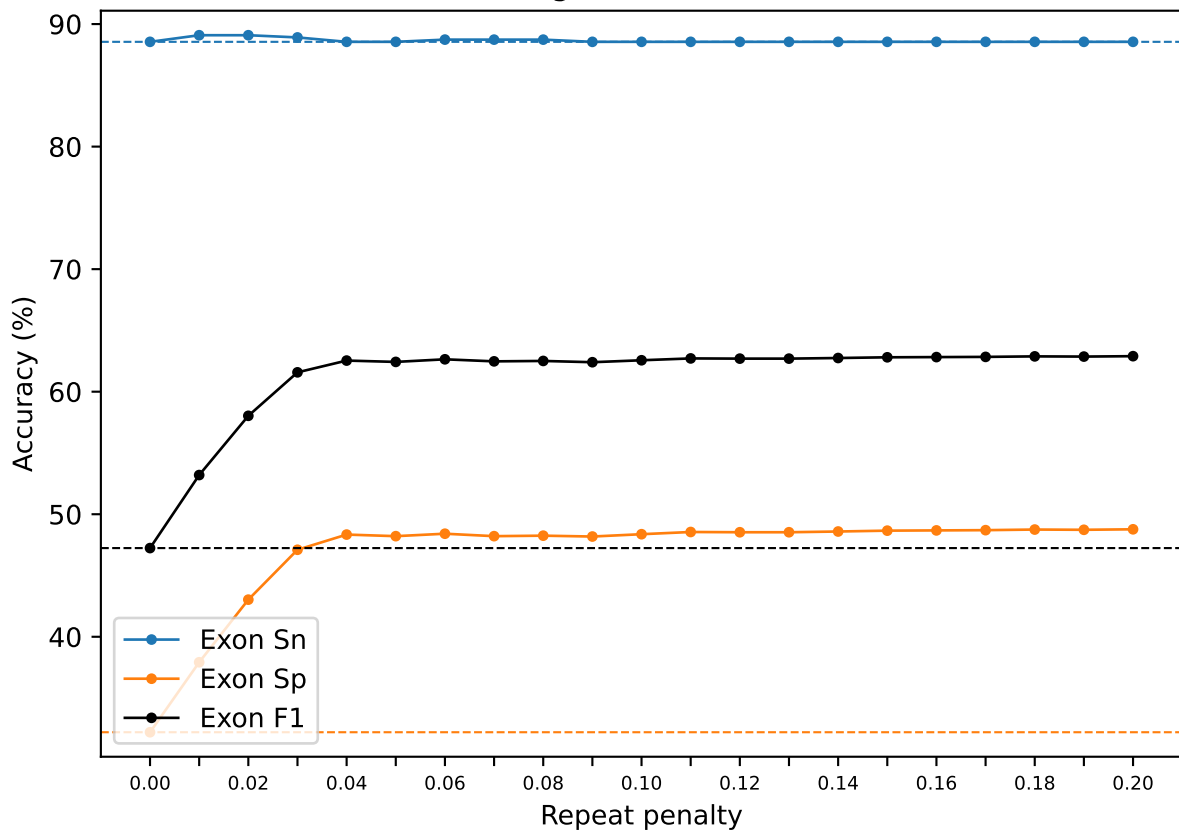

Supplement: Supplemental_Code.zip [file cds.acc.pdf › Supplemental_Code/Gallus_gallus/order_excluded.fa/maskingExperiments/low_penaltyPredictions/cds.acc.pdf]

# G. gallus, low GC

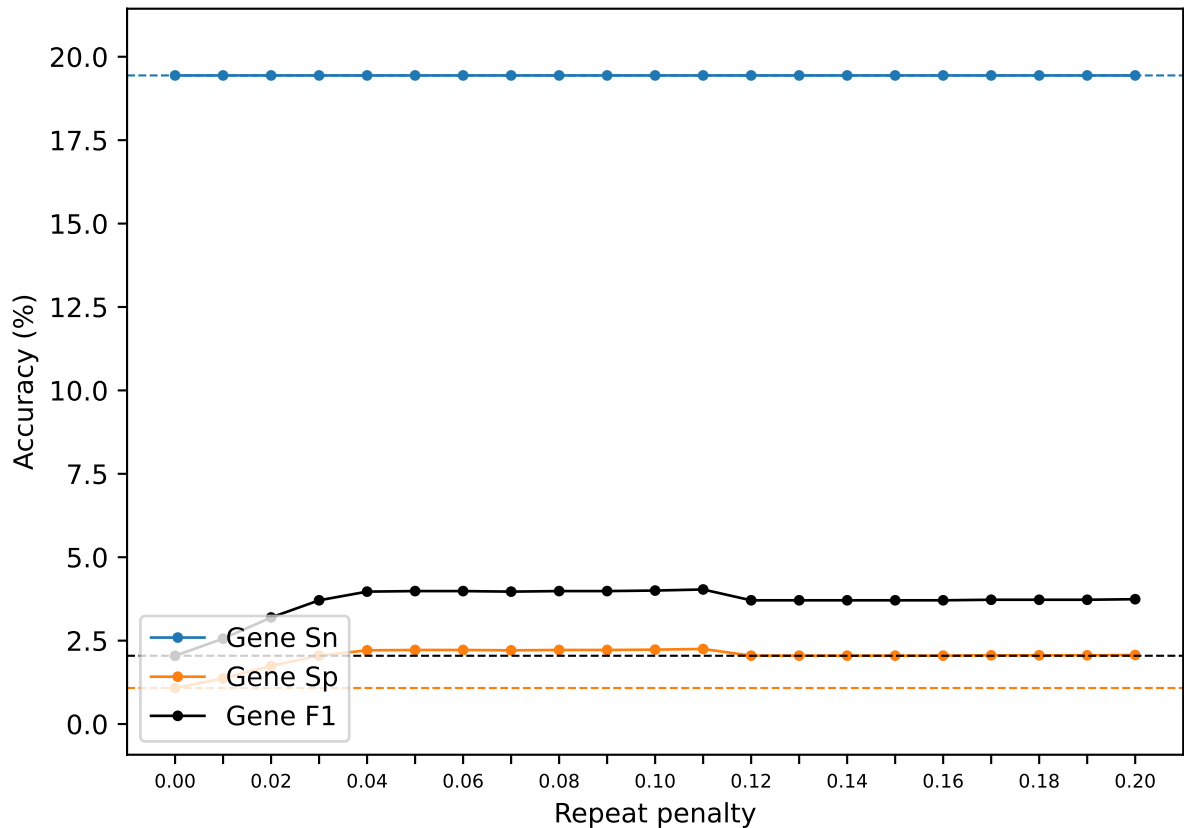

Supplement: Supplemental_Code.zip [file gene.acc.pdf › Supplemental_Code/Gallus_gallus/order_excluded.fa/maskingExperiments/low_penaltyPredictions/gene.acc.pdf]

*Mus musculus*

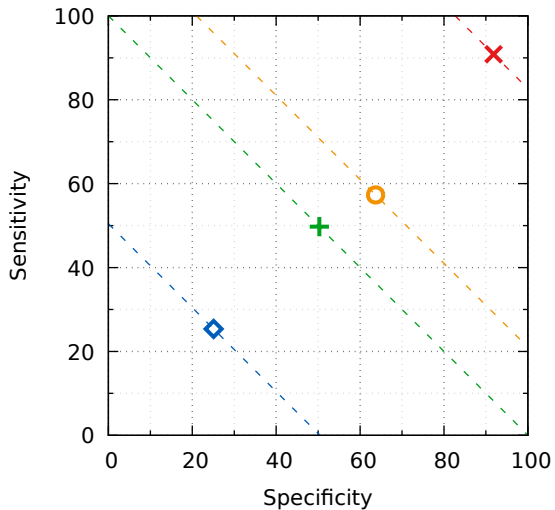

Supplement: Supplemental_Code.zip [file GM.Mus_musculus.order.Exon.pdf › Supplemental_Code/Mus_musculus/acc_figures/GM.Mus_musculus.order.Exon.pdf]

*Mus musculus*

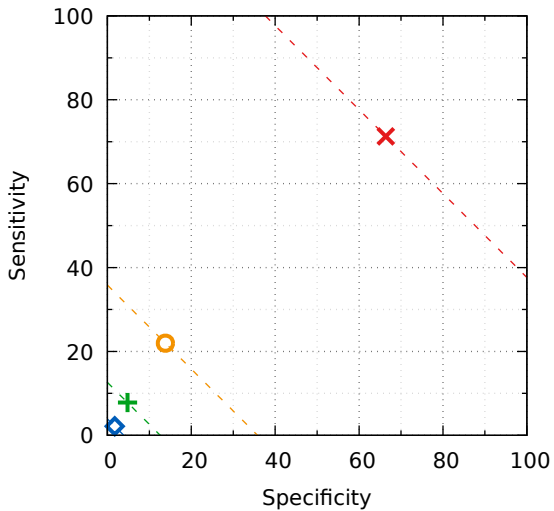

Supplement: Supplemental_Code.zip [file GM.Mus_musculus.order.Gene.pdf › Supplemental_Code/Mus_musculus/acc_figures/GM.Mus_musculus.order.Gene.pdf]

*Mus musculus*

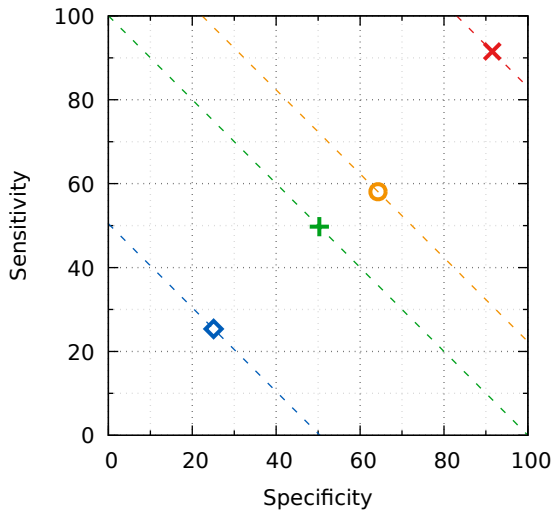

Supplement: Supplemental_Code.zip [file GM.Mus_musculus.species.Exon.pdf › Supplemental_Code/Mus_musculus/acc_figures/GM.Mus_musculus.species.Exon.pdf]

*Mus musculus*

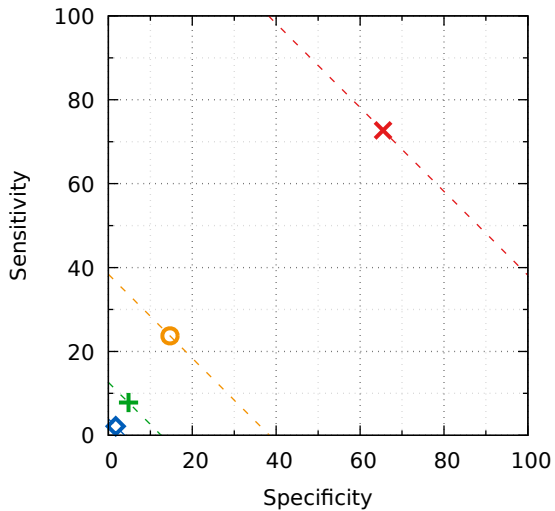

Supplement: Supplemental_Code.zip [file GM.Mus_musculus.species.Gene.pdf › Supplemental_Code/Mus_musculus/acc_figures/GM.Mus_musculus.species.Gene.pdf]

*Mus musculus*

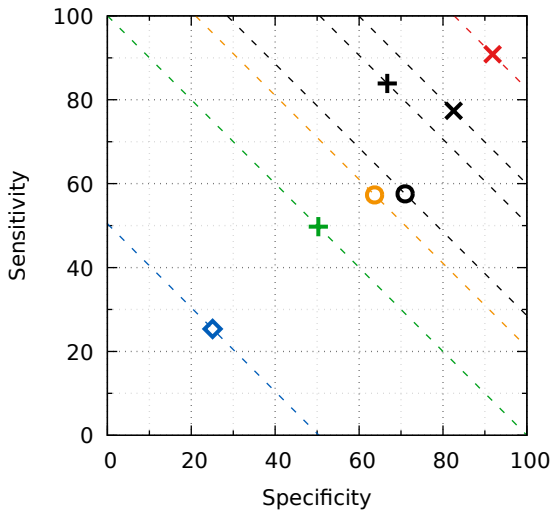

Supplement: Supplemental_Code.zip [file all.Mus_musculus.order.Exon.pdf › Supplemental_Code/Mus_musculus/acc_figures/all.Mus_musculus.order.Exon.pdf]

*Mus musculus*

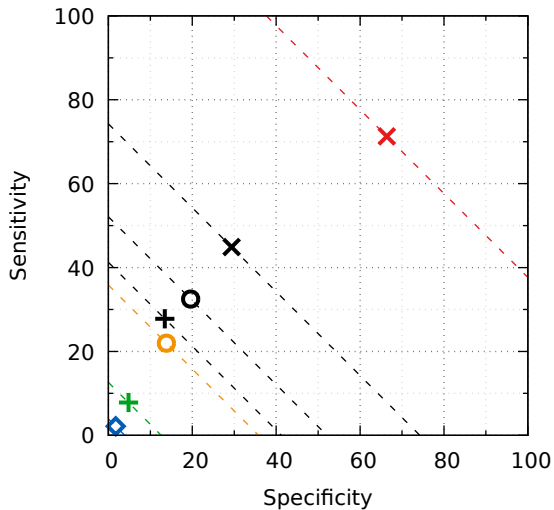

Supplement: Supplemental_Code.zip [file all.Mus_musculus.order.Gene.pdf › Supplemental_Code/Mus_musculus/acc_figures/all.Mus_musculus.order.Gene.pdf]

*Mus musculus*

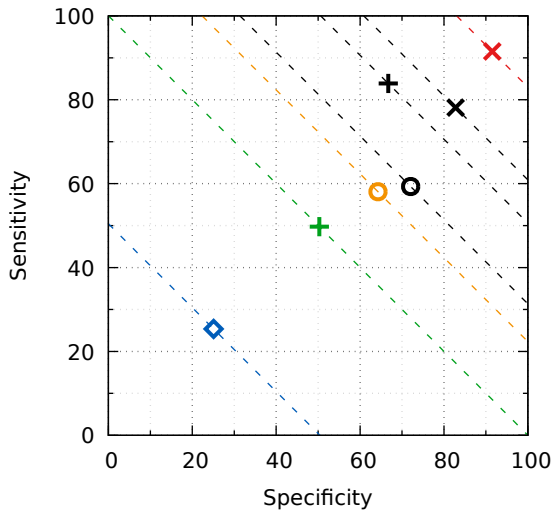

Supplement: Supplemental_Code.zip [file all.Mus_musculus.species.Exon.pdf › Supplemental_Code/Mus_musculus/acc_figures/all.Mus_musculus.species.Exon.pdf]

*Mus musculus*

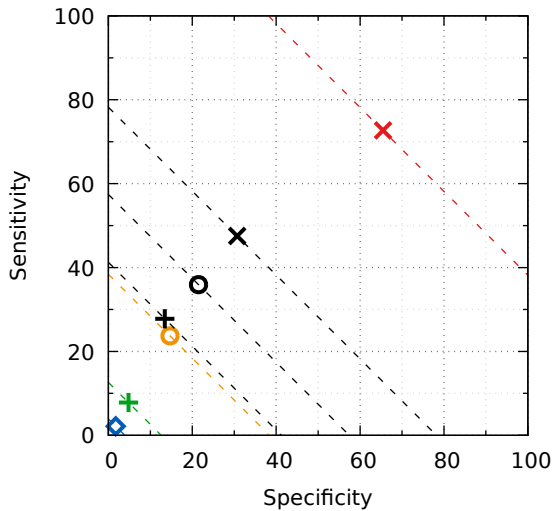

Supplement: Supplemental_Code.zip [file all.Mus_musculus.species.Gene.pdf › Supplemental_Code/Mus_musculus/acc_figures/all.Mus_musculus.species.Gene.pdf]

*Mus musculus*

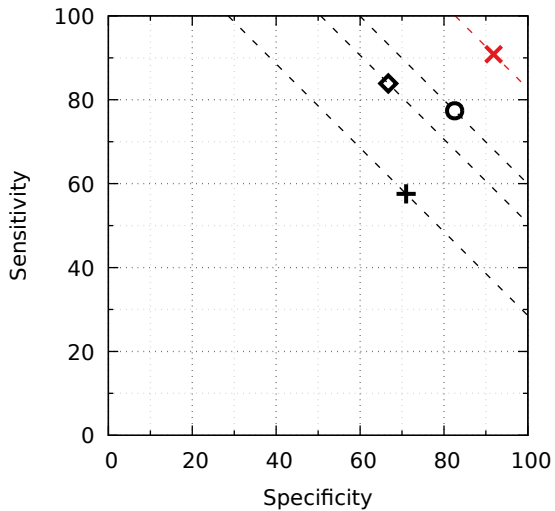

Supplement: Supplemental_Code.zip [file tsebra.Mus_musculus.order.Exon.pdf › Supplemental_Code/Mus_musculus/acc_figures/tsebra.Mus_musculus.order.Exon.pdf]

*Mus musculus*

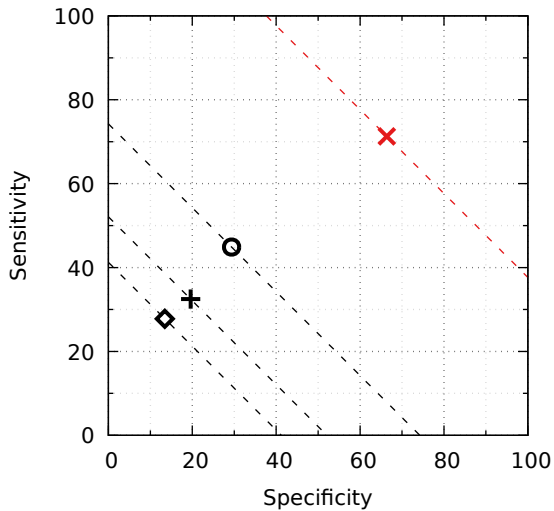

Supplement: Supplemental_Code.zip [file tsebra.Mus_musculus.order.Gene.pdf › Supplemental_Code/Mus_musculus/acc_figures/tsebra.Mus_musculus.order.Gene.pdf]

*Mus musculus*

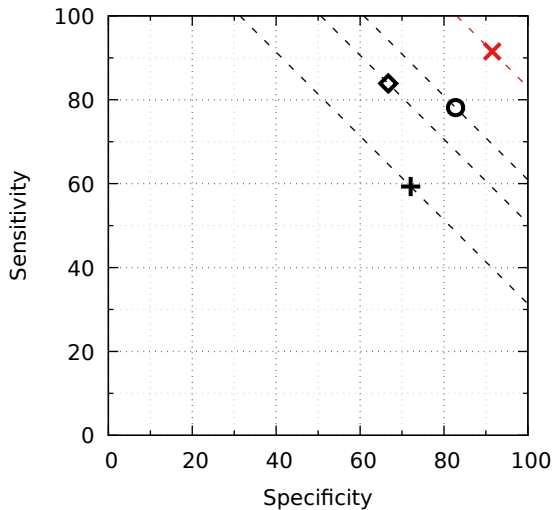

Supplement: Supplemental_Code.zip [file tsebra.Mus_musculus.species.Exon.pdf › Supplemental_Code/Mus_musculus/acc_figures/tsebra.Mus_musculus.species.Exon.pdf]

*Mus musculus*

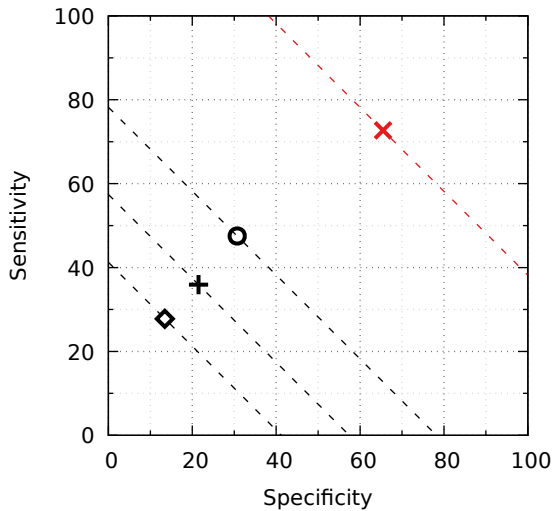

Supplement: Supplemental_Code.zip [file tsebra.Mus_musculus.species.Gene.pdf › Supplemental_Code/Mus_musculus/acc_figures/tsebra.Mus_musculus.species.Gene.pdf]

# M. musculus, high GC

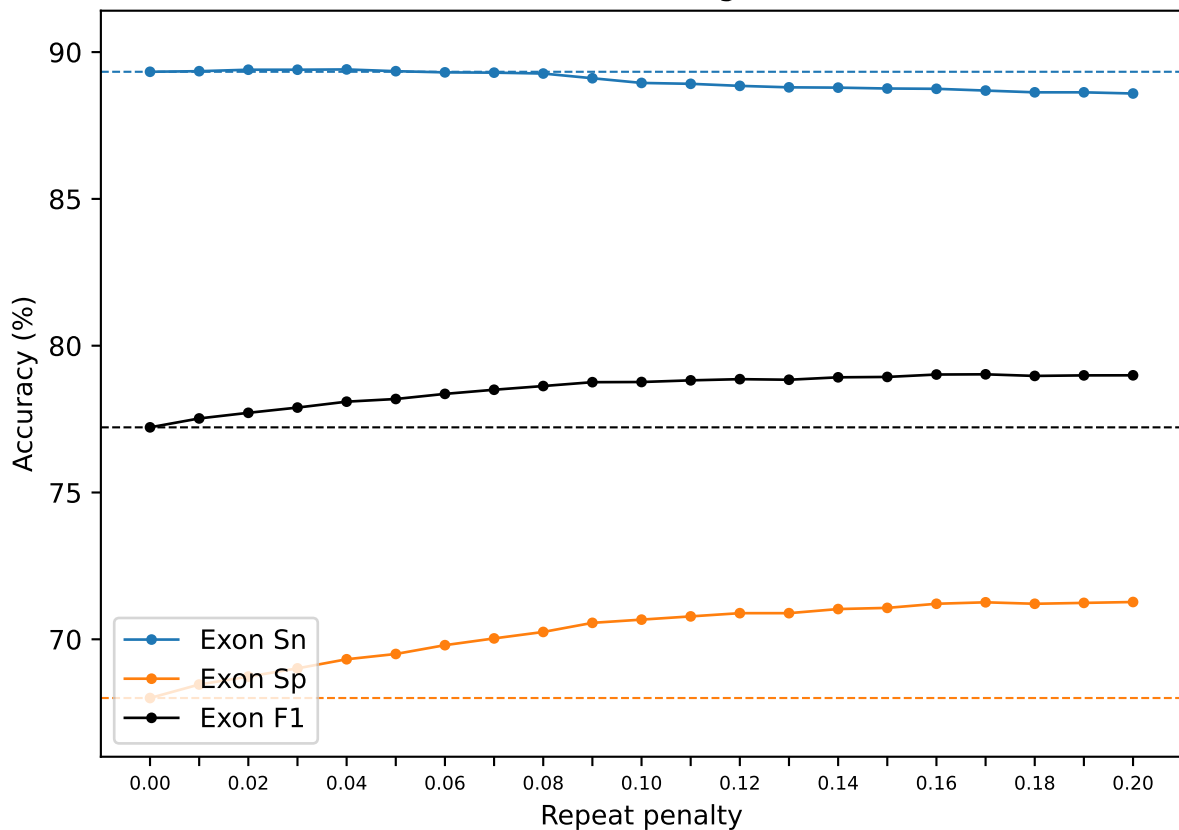

Supplement: Supplemental_Code.zip [file cds.acc.pdf › Supplemental_Code/Mus_musculus/order_excluded.fa/maskingExperiments/high_penaltyPredictions/cds.acc.pdf]

# M. musculus, high GC

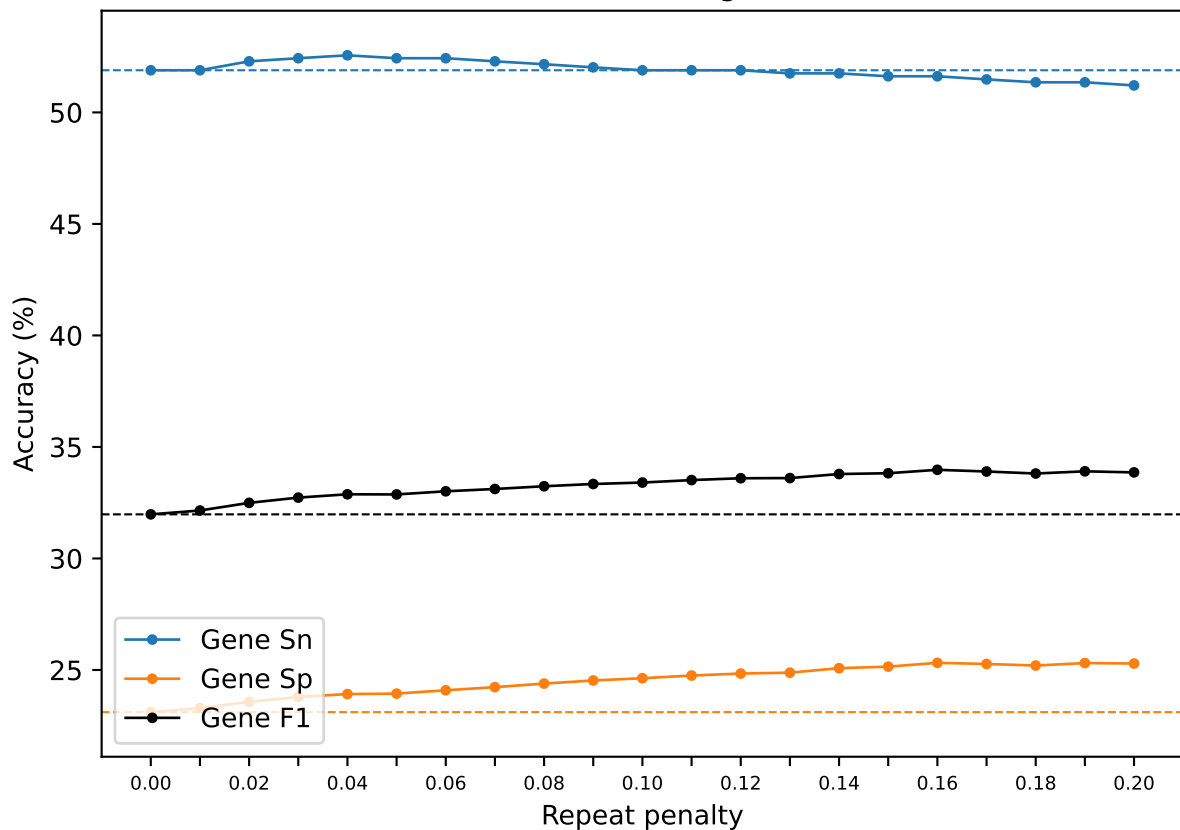

Supplement: Supplemental_Code.zip [file gene.acc.pdf › Supplemental_Code/Mus_musculus/order_excluded.fa/maskingExperiments/high_penaltyPredictions/gene.acc.pdf]

# M. musculus, low GC

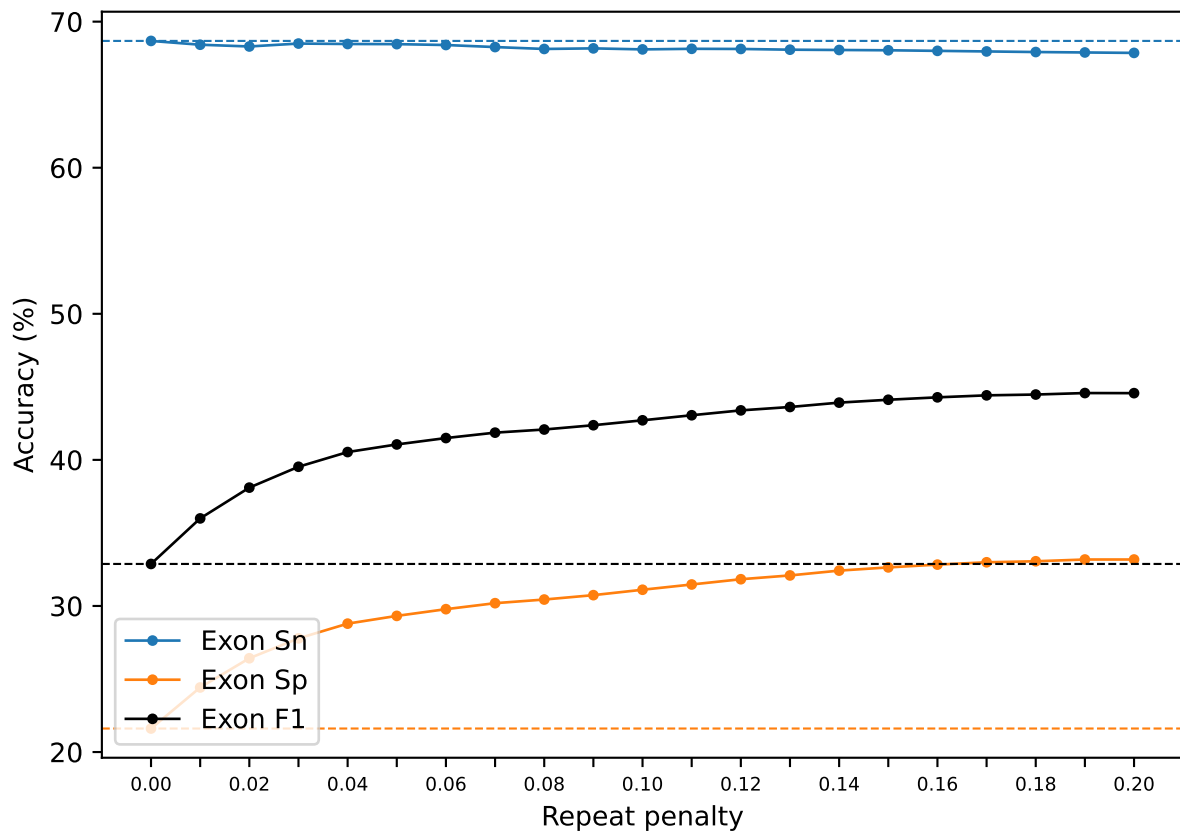

Supplement: Supplemental_Code.zip [file cds.acc.pdf › Supplemental_Code/Mus_musculus/order_excluded.fa/maskingExperiments/low_penaltyPredictions/cds.acc.pdf]

# M. musculus, low GC

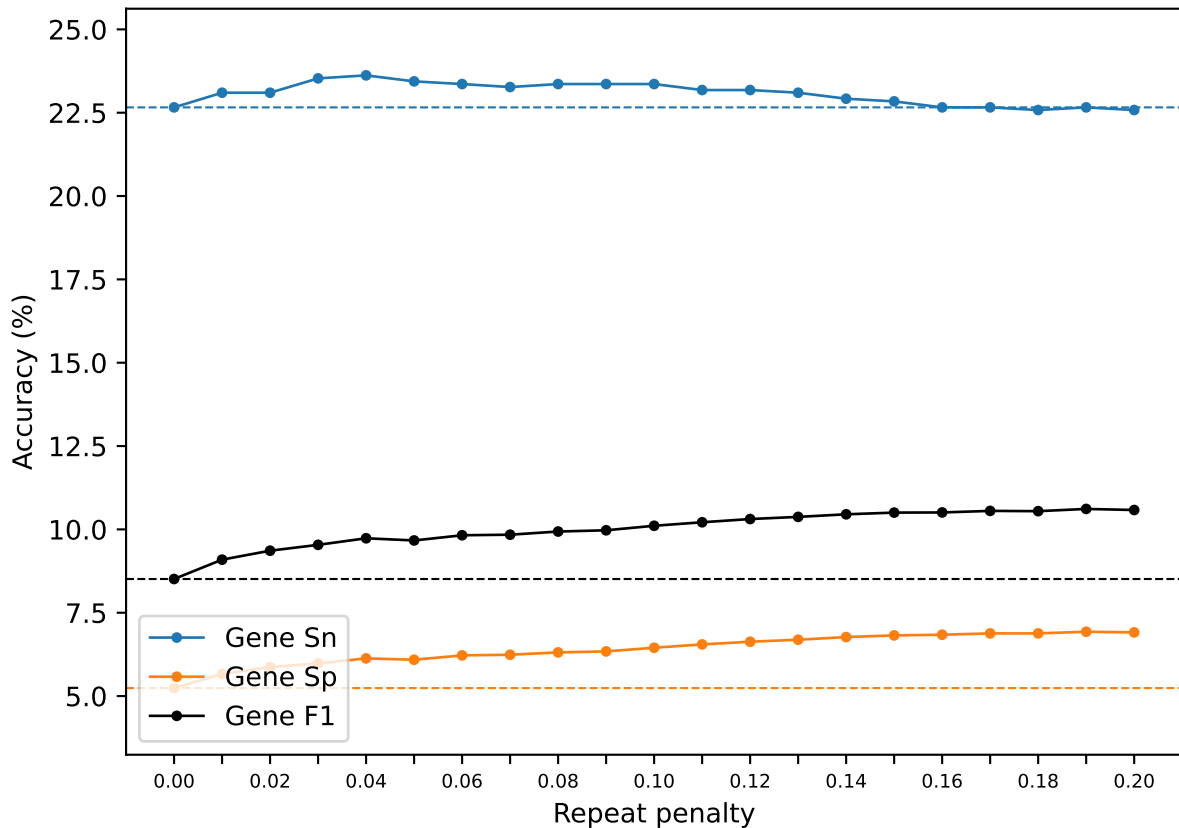

Supplement: Supplemental_Code.zip [file gene.acc.pdf › Supplemental_Code/Mus_musculus/order_excluded.fa/maskingExperiments/low_penaltyPredictions/gene.acc.pdf]

# M. musculus, medium GC

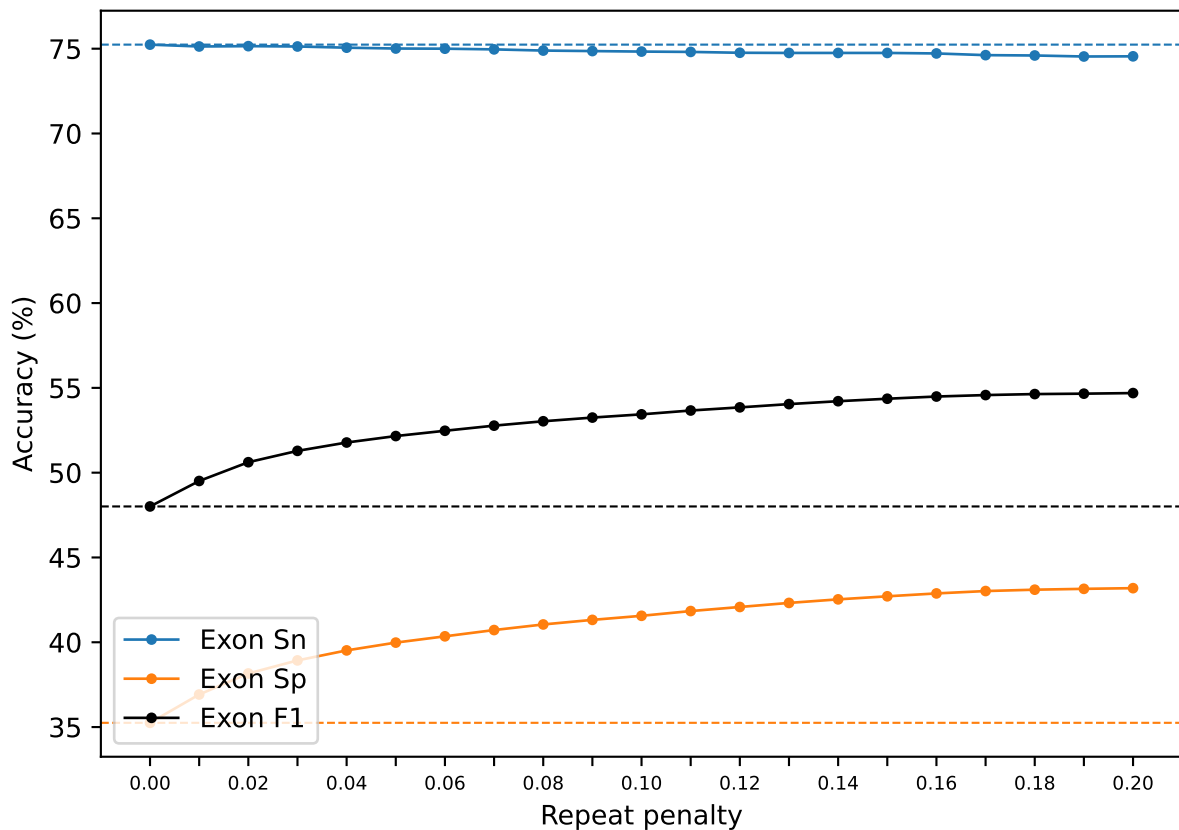

Supplement: Supplemental_Code.zip [file cds.acc.pdf › Supplemental_Code/Mus_musculus/order_excluded.fa/maskingExperiments/medium_penaltyPredictions/cds.acc.pdf]

# M. musculus, high GC

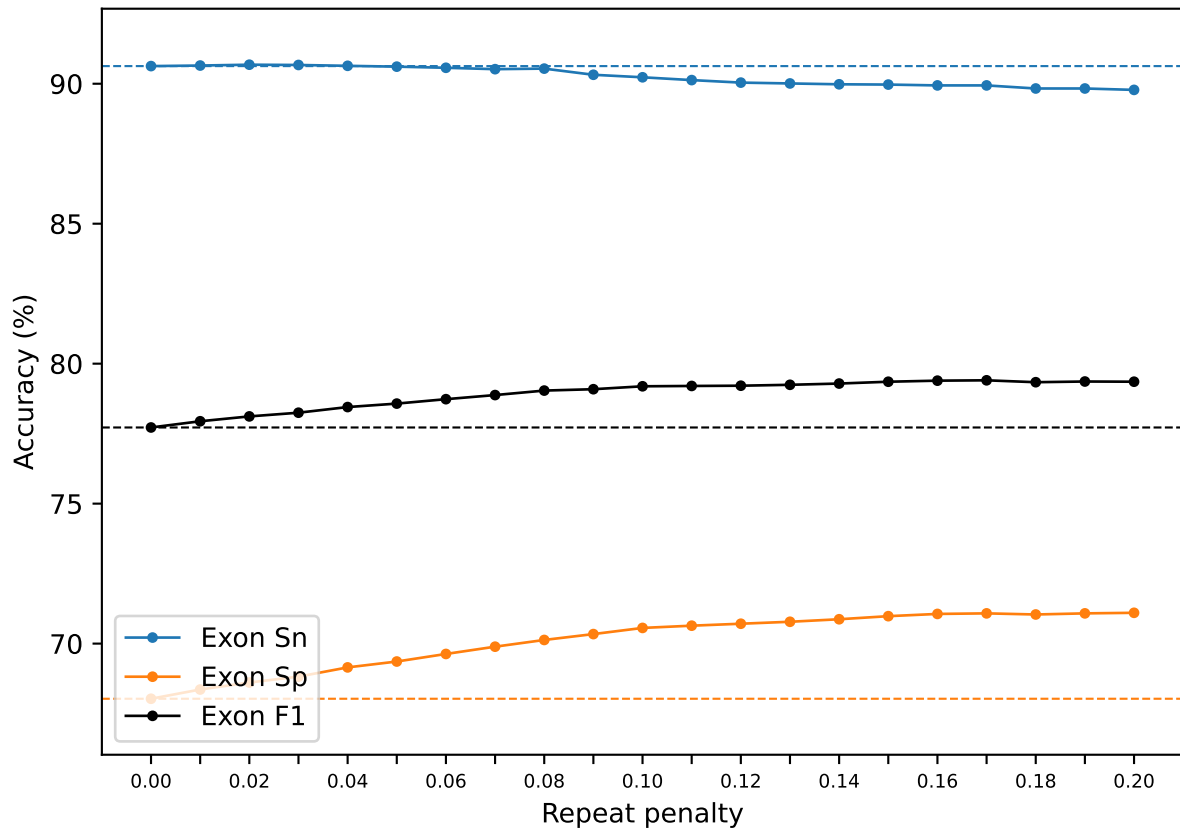

Supplement: Supplemental_Code.zip [file cds.acc.pdf › Supplemental_Code/Mus_musculus/species_excluded.fa/maskingExperiments/high_penaltyPredictions/cds.acc.pdf]

# M. musculus, low GC

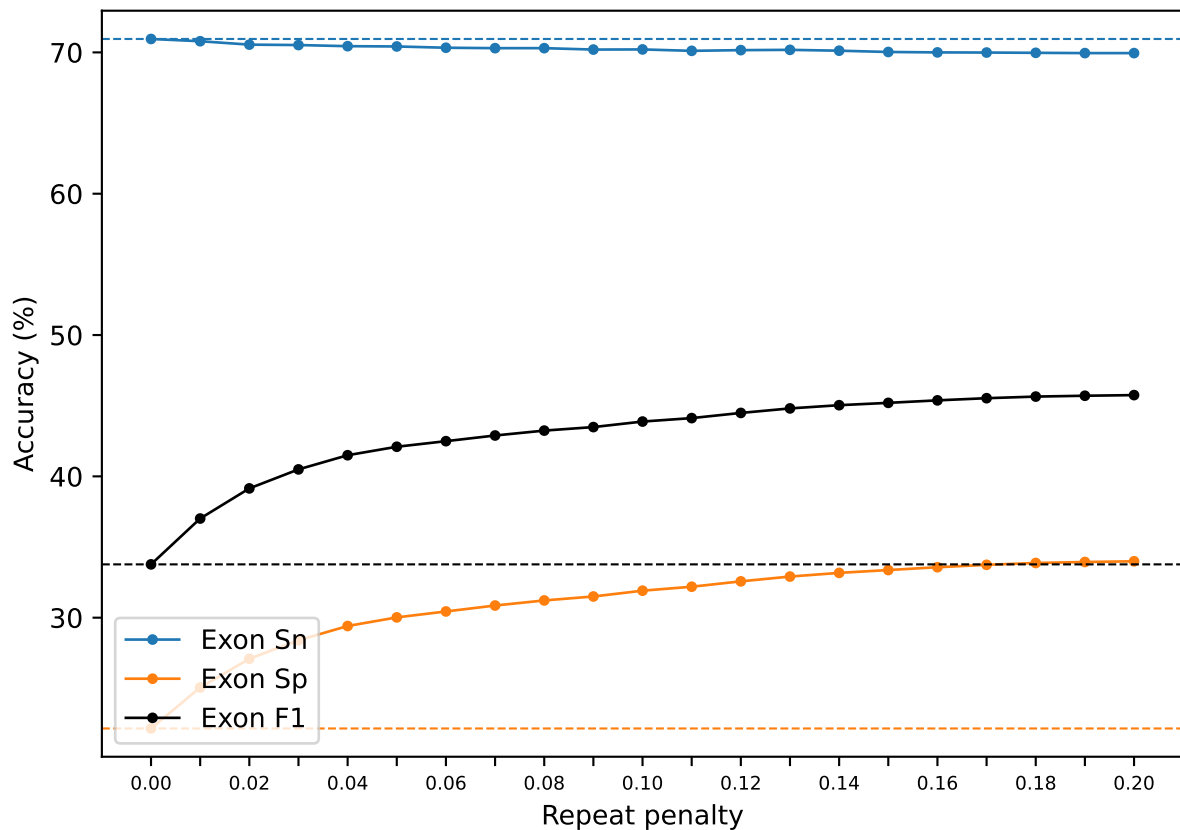

Supplement: Supplemental_Code.zip [file cds.acc.pdf › Supplemental_Code/Mus_musculus/species_excluded.fa/maskingExperiments/low_penaltyPredictions/cds.acc.pdf]

# M. musculus, low GC

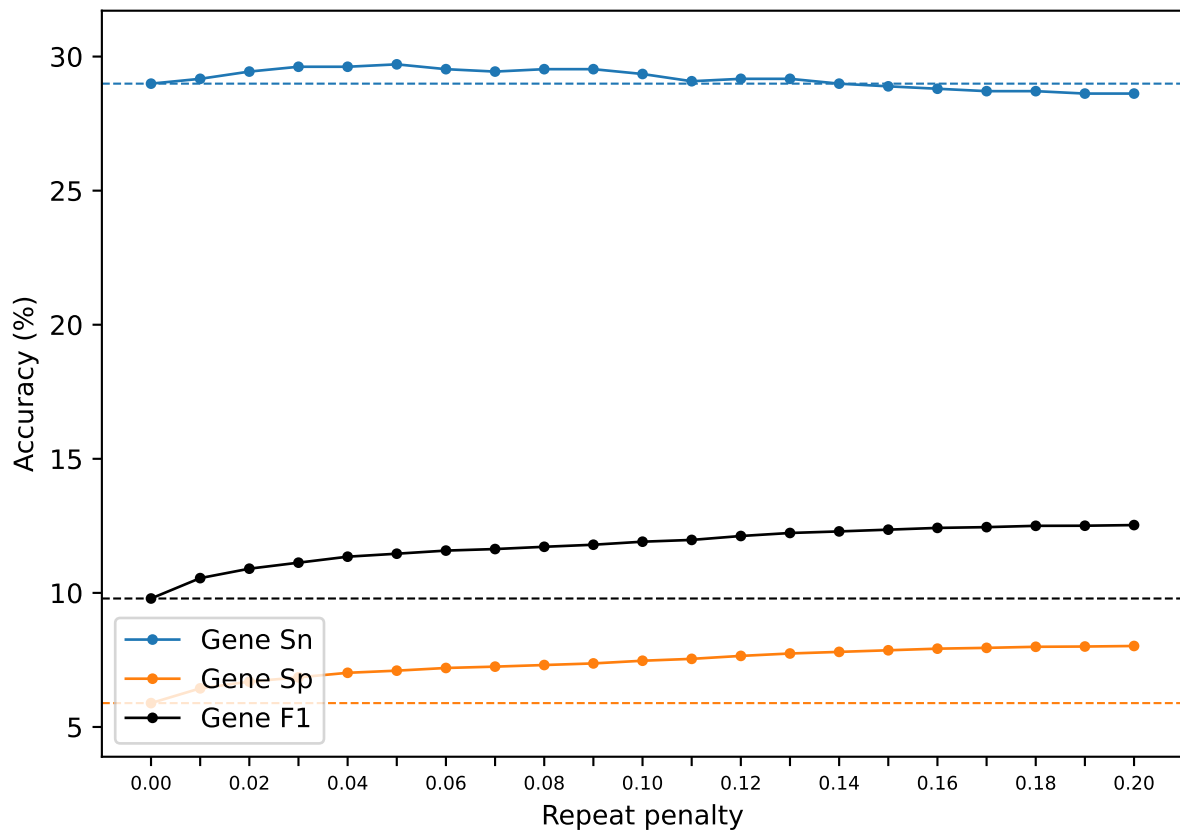

Supplement: Supplemental_Code.zip [file gene.acc.pdf › Supplemental_Code/Mus_musculus/species_excluded.fa/maskingExperiments/low_penaltyPredictions/gene.acc.pdf]

*Solanum lycopersicum*

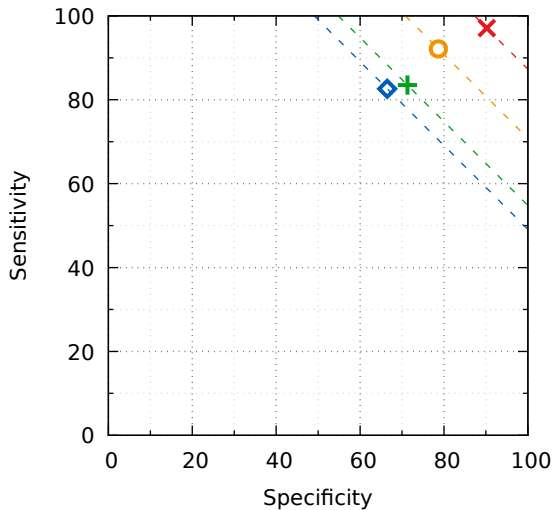

Supplement: Supplemental_Code.zip [file GM.Solanum_lycopersicum.genus.Exon.pdf › Supplemental_Code/Solanum_lycopersicum/acc_figures/GM.Solanum_lycopersicum.genus.Exon.pdf]

*Solanum lycopersicum*

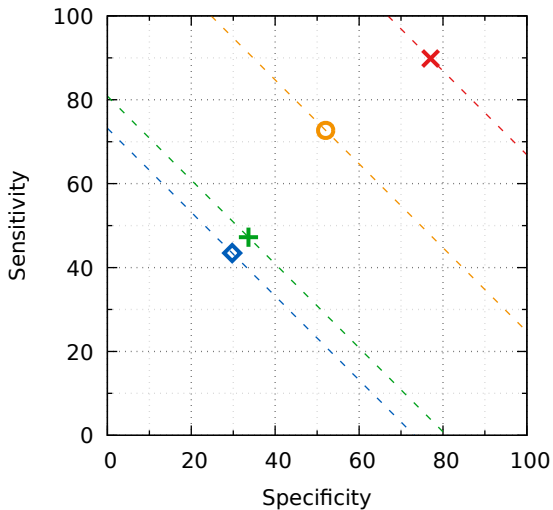

Supplement: Supplemental_Code.zip [file GM.Solanum_lycopersicum.genus.Gene.pdf › Supplemental_Code/Solanum_lycopersicum/acc_figures/GM.Solanum_lycopersicum.genus.Gene.pdf]

*Solanum lycopersicum*

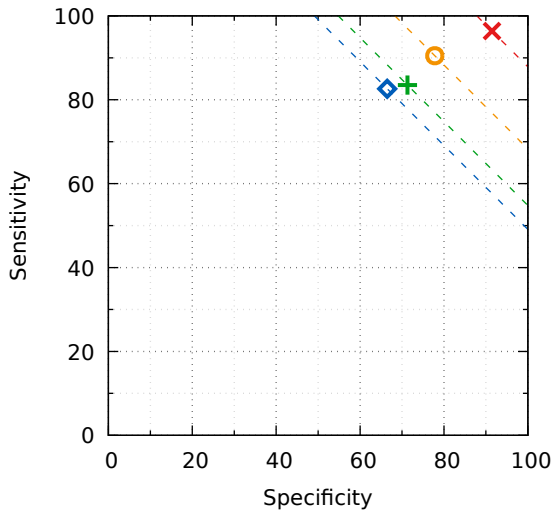

Supplement: Supplemental_Code.zip [file GM.Solanum_lycopersicum.order.Exon.pdf › Supplemental_Code/Solanum_lycopersicum/acc_figures/GM.Solanum_lycopersicum.order.Exon.pdf]

*Solanum lycopersicum*

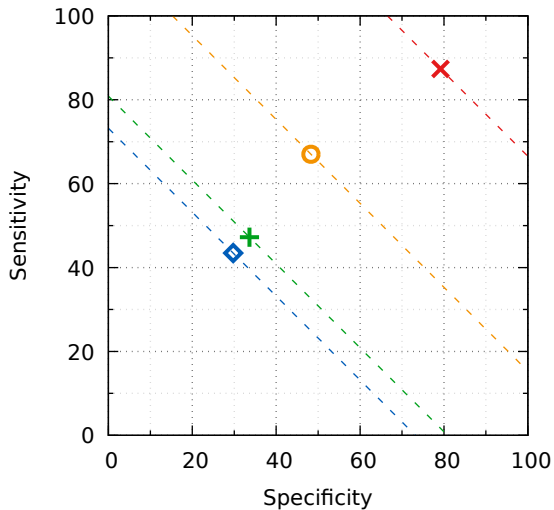

Supplement: Supplemental_Code.zip [file GM.Solanum_lycopersicum.order.Gene.pdf › Supplemental_Code/Solanum_lycopersicum/acc_figures/GM.Solanum_lycopersicum.order.Gene.pdf]

*Solanum lycopersicum*

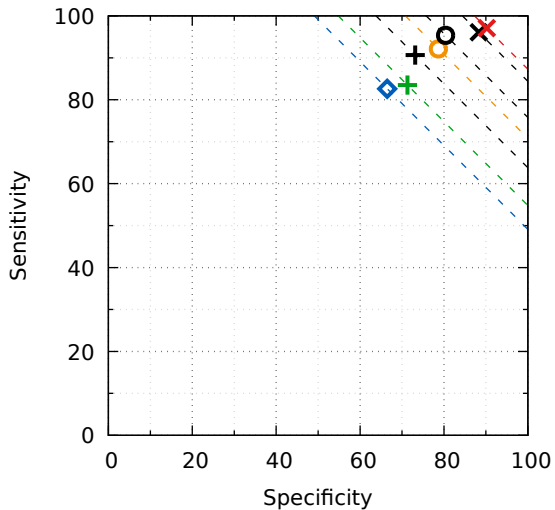

Supplement: Supplemental_Code.zip [file all.Solanum_lycopersicum.genus.Exon.pdf › Supplemental_Code/Solanum_lycopersicum/acc_figures/all.Solanum_lycopersicum.genus.Exon.pdf]

*Solanum lycopersicum*

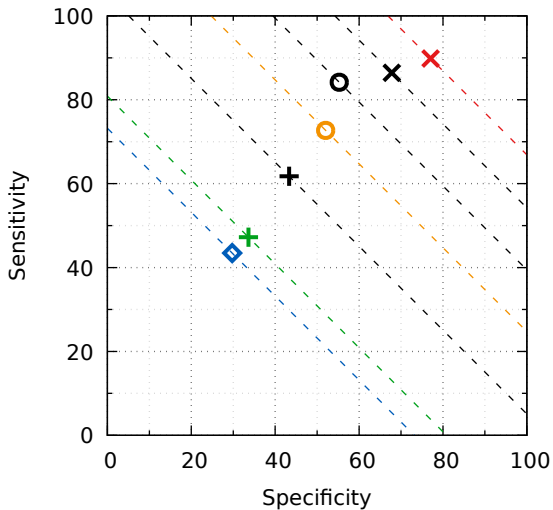

Supplement: Supplemental_Code.zip [file all.Solanum_lycopersicum.genus.Gene.pdf › Supplemental_Code/Solanum_lycopersicum/acc_figures/all.Solanum_lycopersicum.genus.Gene.pdf]

*Solanum lycopersicum*

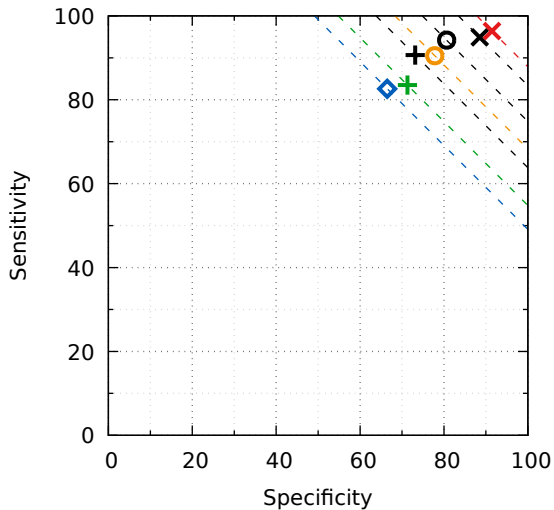

Supplement: Supplemental_Code.zip [file all.Solanum_lycopersicum.order.Exon.pdf › Supplemental_Code/Solanum_lycopersicum/acc_figures/all.Solanum_lycopersicum.order.Exon.pdf]

*Solanum lycopersicum*

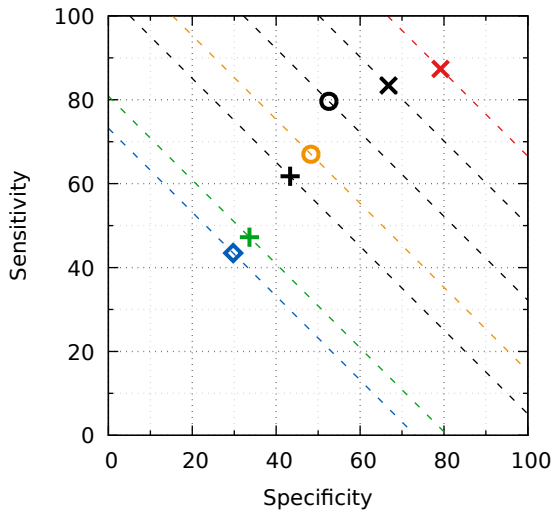

Supplement: Supplemental_Code.zip [file all.Solanum_lycopersicum.order.Gene.pdf › Supplemental_Code/Solanum_lycopersicum/acc_figures/all.Solanum_lycopersicum.order.Gene.pdf]

*Solanum lycopersicum*

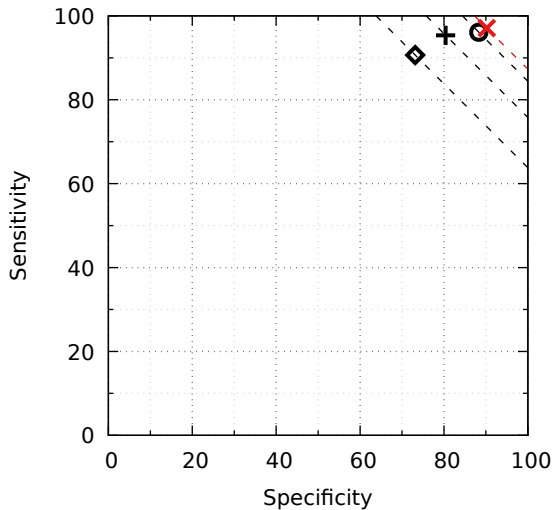

Supplement: Supplemental_Code.zip [file tsebra.Solanum_lycopersicum.genus.Exon.pdf › Supplemental_Code/Solanum_lycopersicum/acc_figures/tsebra.Solanum_lycopersicum.genus.Exon.pdf]

*Solanum lycopersicum*

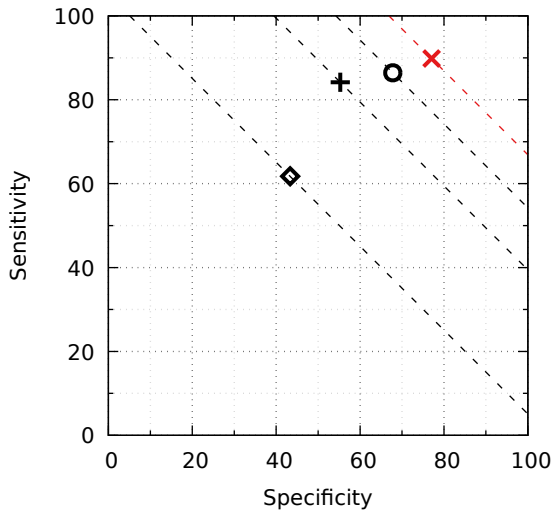

Supplement: Supplemental_Code.zip [file tsebra.Solanum_lycopersicum.genus.Gene.pdf › Supplemental_Code/Solanum_lycopersicum/acc_figures/tsebra.Solanum_lycopersicum.genus.Gene.pdf]

*Solanum lycopersicum*

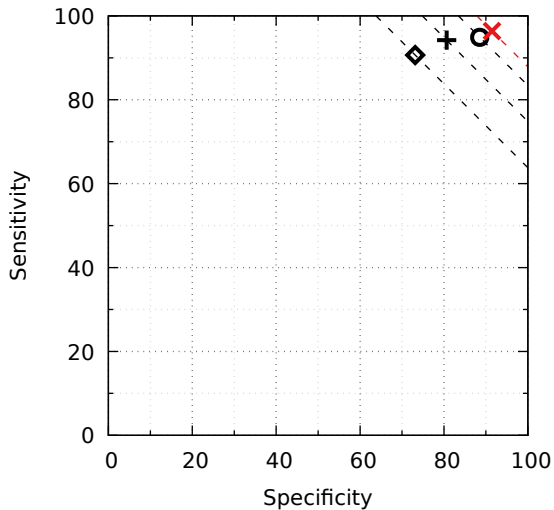

Supplement: Supplemental_Code.zip [file tsebra.Solanum_lycopersicum.order.Exon.pdf › Supplemental_Code/Solanum_lycopersicum/acc_figures/tsebra.Solanum_lycopersicum.order.Exon.pdf]
