# Supplementary figures and images for: GeneMark-ETP significantly improves the accuracy of automatic annotation of large eukaryotic genomes (part 2 of 2)
Source: HighWire-hosted journal article supplement (doi:10.1101/gr.278373.123), 2024-05-01

*Solanum lycopersicum*

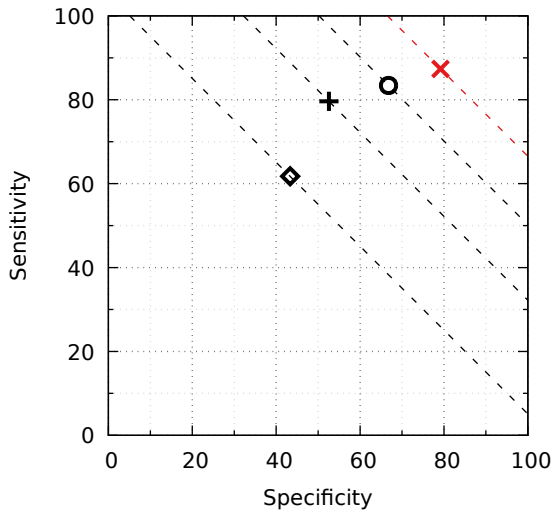

Supplement: Supplemental_Code.zip [file tsebra.Solanum_lycopersicum.order.Gene.pdf › Supplemental_Code/Solanum_lycopersicum/acc_figures/tsebra.Solanum_lycopersicum.order.Gene.pdf]
